# Supplementary material for: Nickel(ii) complexes with 14-membered bis-thiosemicarbazide and bis-isothiosemicarbazide ligands: synthesis, characterization and catalysis of oxygen evolution reaction
Source: Royal Society of Chemistry journal article supplement (doi:10.1039/d4dt02182g), 2024-01-01
Supplement: d4dt02182g1.pdf [file d4dt02182g1.pdf]

## Supporting Information

for

### **Nickel(II) Complexes with 14-membered bis-Thiosemicarbazide and bis-Isothiosemicarbazide Ligands: Synthesis, Characterization and Catalysis of Oxygen Evolution Reaction**

Iuliana Besleaga,<sup>a</sup> Anastasia A. Fesenko,<sup>b</sup> Anup Paul,<sup>c</sup> Biljana Šljukić,<sup>d</sup> Peter Rapta,<sup>e,\*</sup> Armando J. L. Pombeiro,<sup>c,\*</sup> Anatoly D. Shutalev,<sup>f,\*</sup> Vladimir B. Arion<sup>a,g,\*</sup>

<sup>a</sup>*University of Vienna, Institute of Inorganic Chemistry, Währinger Strasse 42, A-1090 Vienna, Austria*

<sup>b</sup>*A. N. Frumkin Institute of Physical Chemistry and Electrochemistry, Russian Academy of Sciences, 31 Leninsky Ave., 119071 Moscow, Russian Federation*

<sup>c</sup>*Centro de Química Estrutural, Institute of Molecular Sciences, Instituto Superior Técnico, Universidade de Lisboa, Av. Rovisco Pais, 1049-001 Lisboa, Portugal*

<sup>d</sup>*Center of Physics and Engineering of Advanced Materials, Laboratory of Physics of Materials and Emerging Technologies, Chemical Engineering Department, Instituto Superior Técnico, Universidade de Lisboa, 1049-001, Lisbon, Portugal*

<sup>e</sup>*Institute of Physical Chemistry and Chemical Physics, Faculty of Chemical and Food Technology, Slovak University of Technology in Bratislava, Radlinského 9, SK-81237 Bratislava, Slovak Republic*

<sup>f</sup>*N. D. Zelinsky Institute of Organic Chemistry, Russian Academy of Sciences, 47 Leninsky Ave., 119991 Moscow, Russian Federation*

<sup>g</sup>*Inorganic Polymers Department, “Petru Poni” Institute of Macromolecular Chemistry, Aleea Gr. Ghica Voda 41 A, Iasi 700487, Romania*

## Table of contents

|                                                        |    |
|--------------------------------------------------------|----|
| 1. Characterization of $H_2L^S$ and $H_2L^{SEt}$ ..... | 3  |
| 1.1. NMR spectra of the ligands .....                  | 3  |
| 1.2. ESI-MS of the ligands .....                       | 26 |
| 1.3. IR spectra of the ligands .....                   | 28 |
| 2. Characterization of Ni(II) complexes .....          | 30 |
| 3. Crystallographic data.....                          | 43 |

# 1. Characterization of H<sub>2</sub>L<sup>S</sup> and H<sub>2</sub>L<sup>SEt</sup>

## 1.1. NMR spectra of the ligands

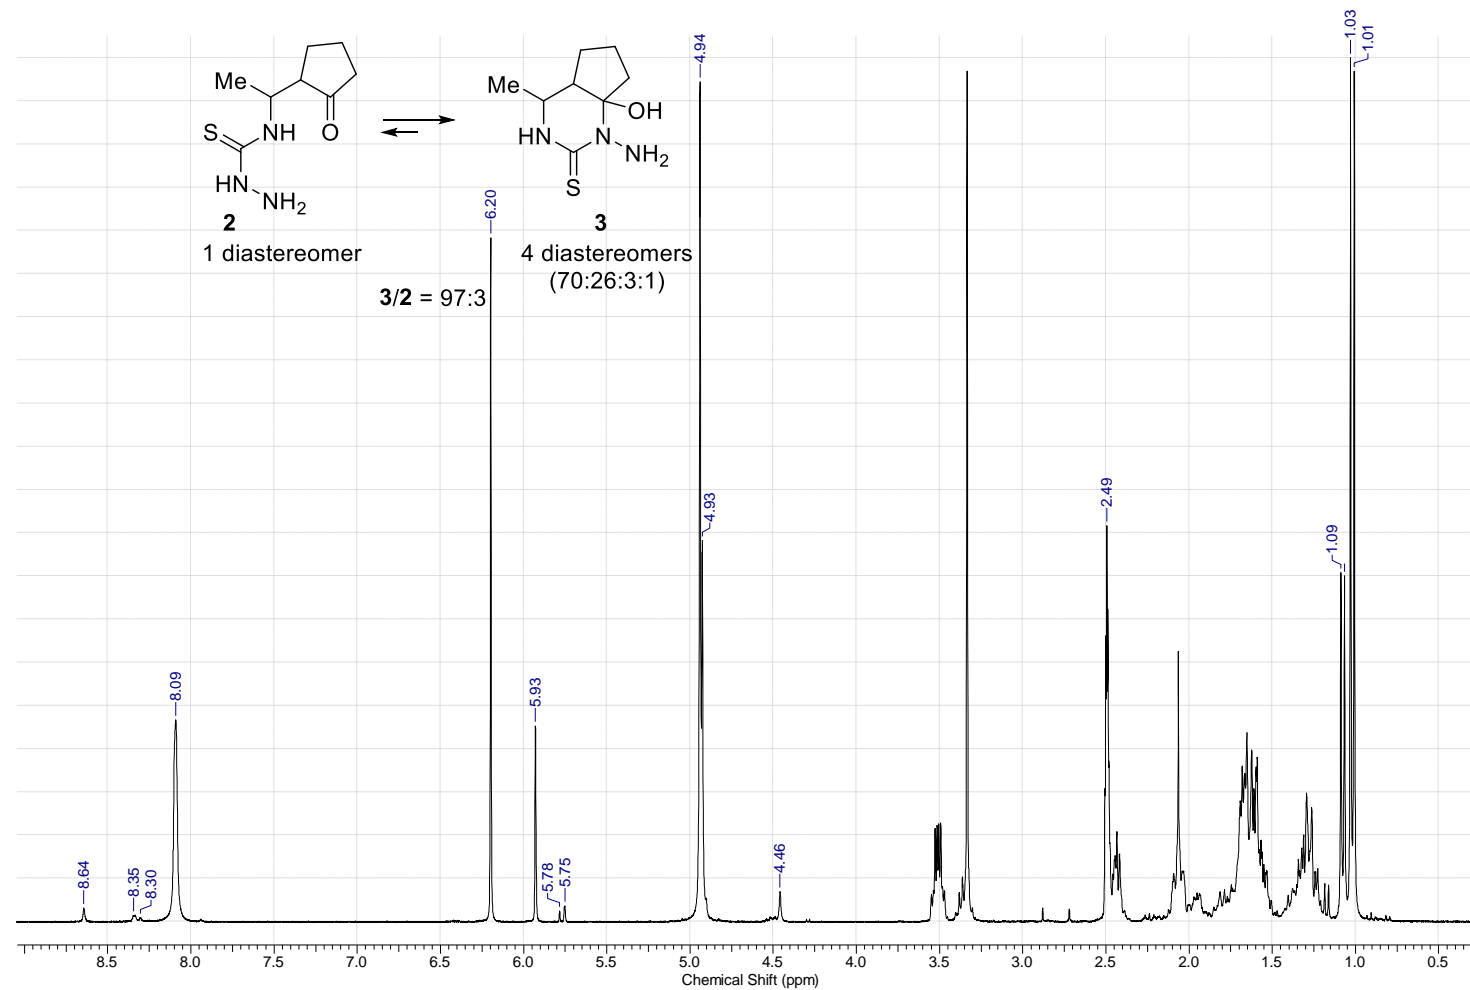

**Figure S1.** <sup>1</sup>H NMR spectrum of the starting material (mixture of 3 and 2) (300.13 MHz, DMSO-*d*<sub>6</sub>)

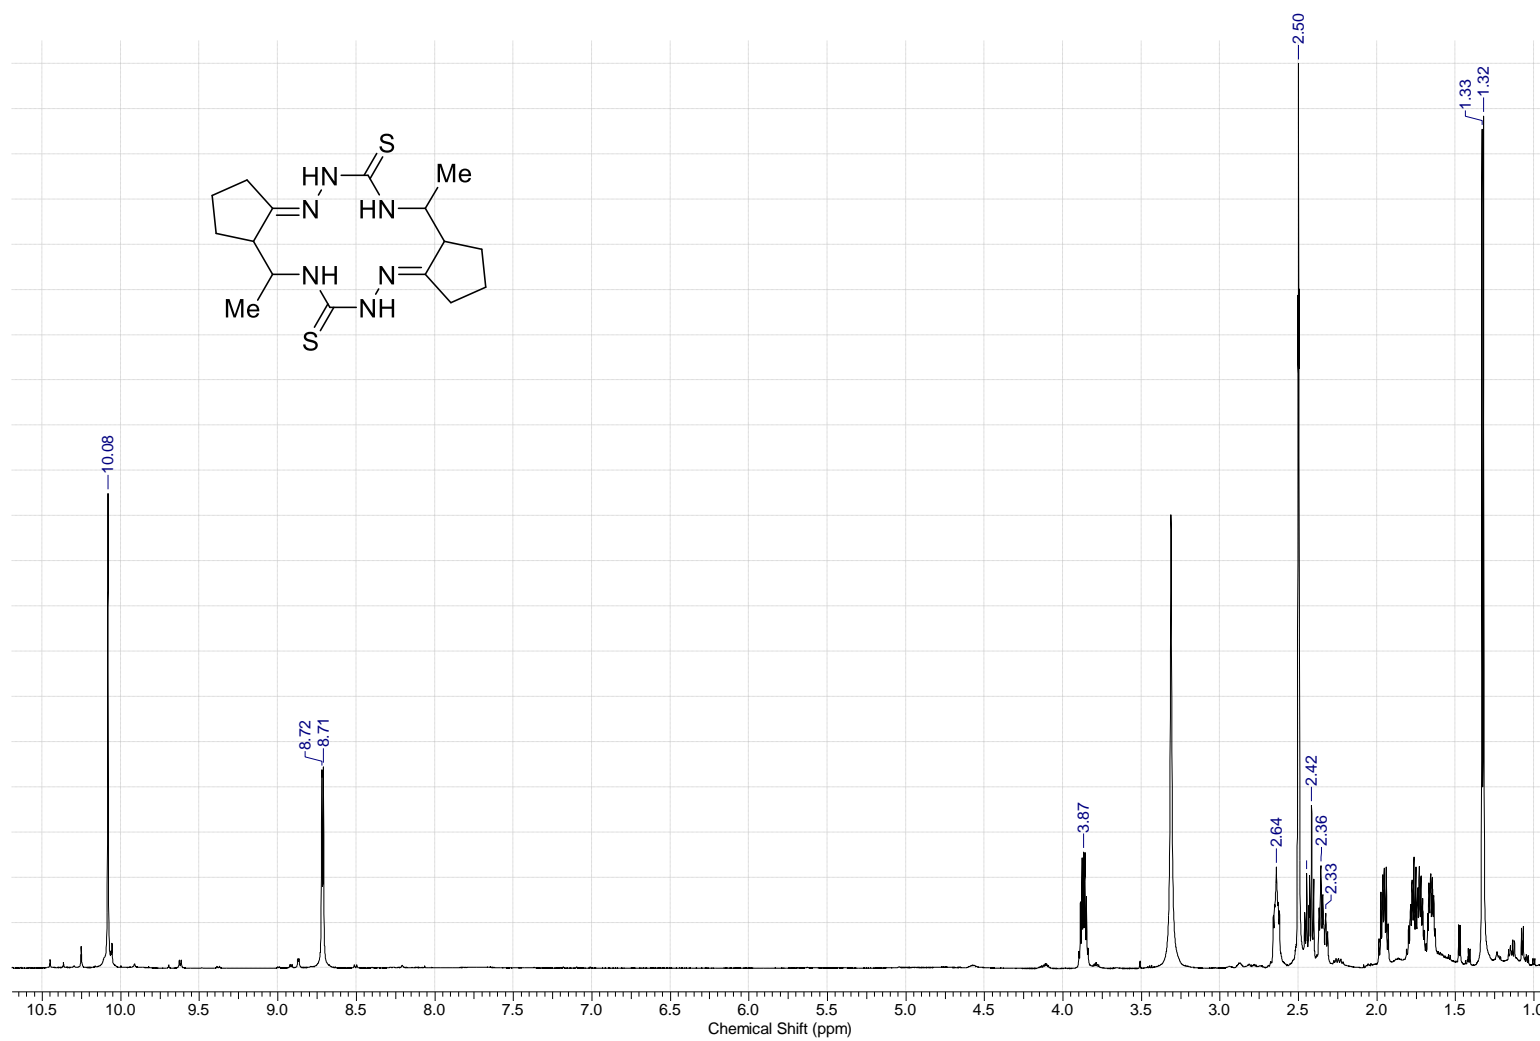

**Figure S2.** <sup>1</sup>H NMR spectrum of crude **6** prepared by the treatment of the mixture of **3** and **2** with NH<sub>2</sub>OH·HCl (1.25 equiv) (EtOH, reflux, 2 h) (600.13 MHz, DMSO-*d*<sub>6</sub>)

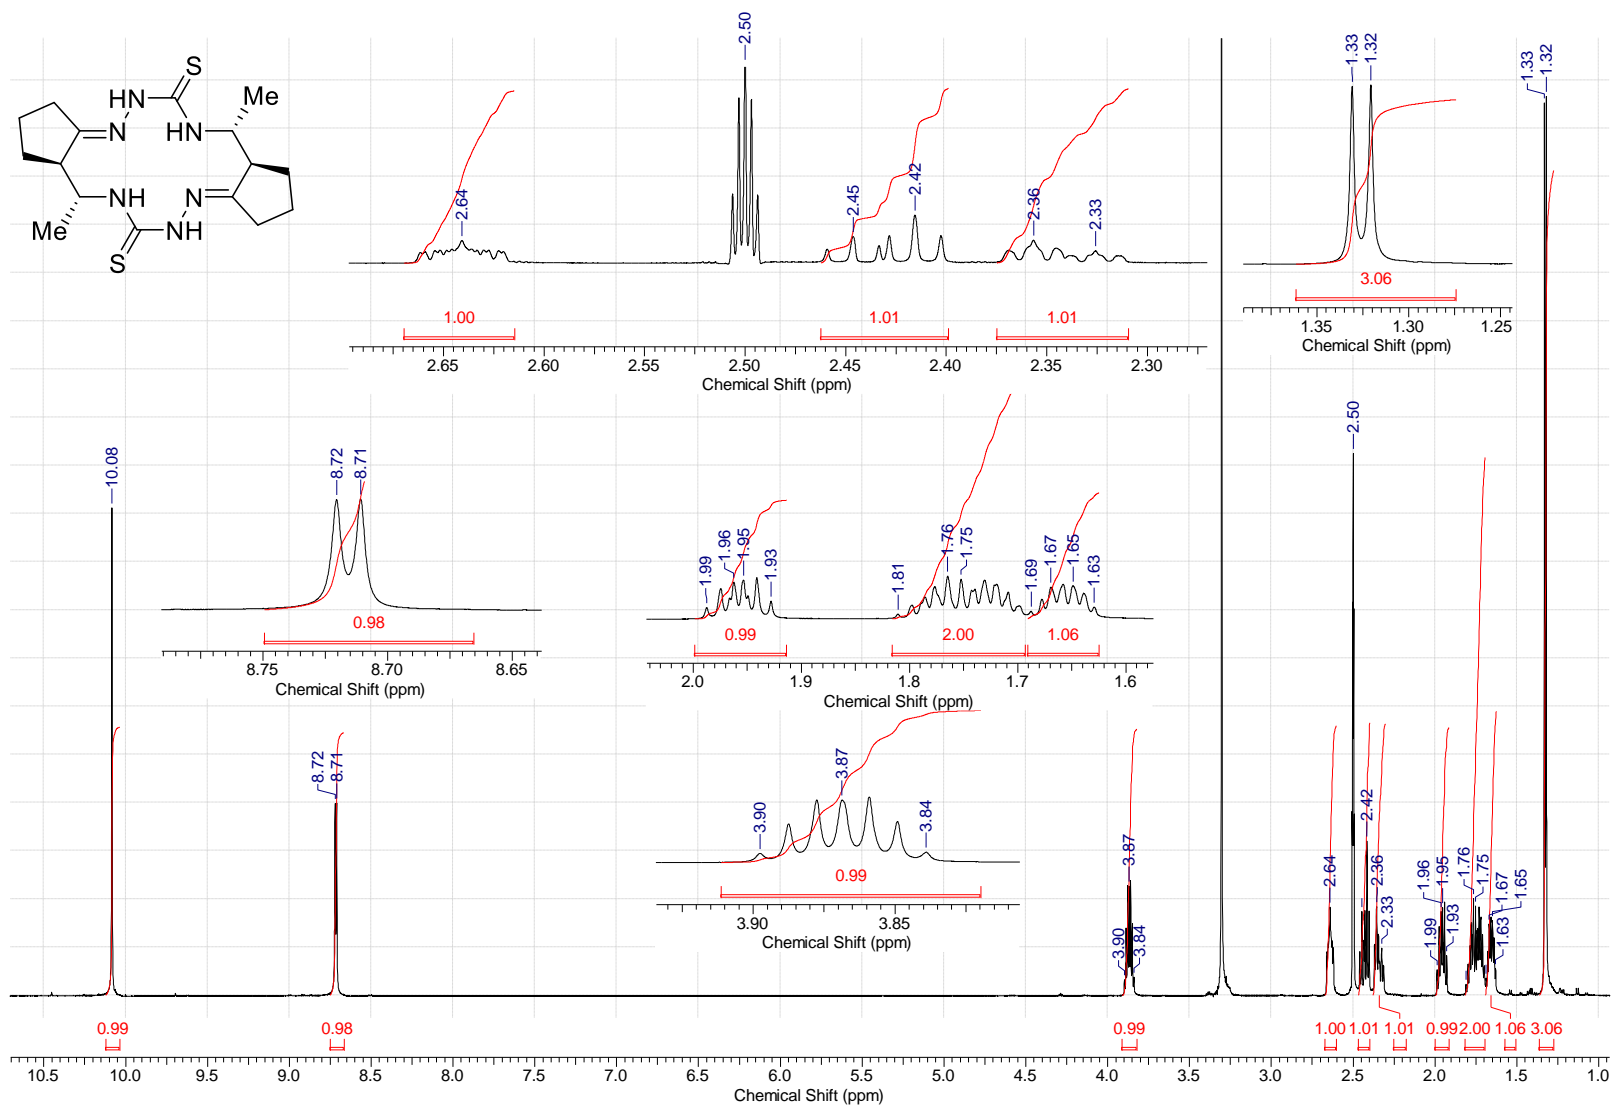

**Figure S3A.**  $^1\text{H}$  NMR spectrum of  $(5R^*,6R^*,12R^*,13R^*)$ -6 (600.13 MHz,  $\text{DMSO-}d_6$ )  
S5

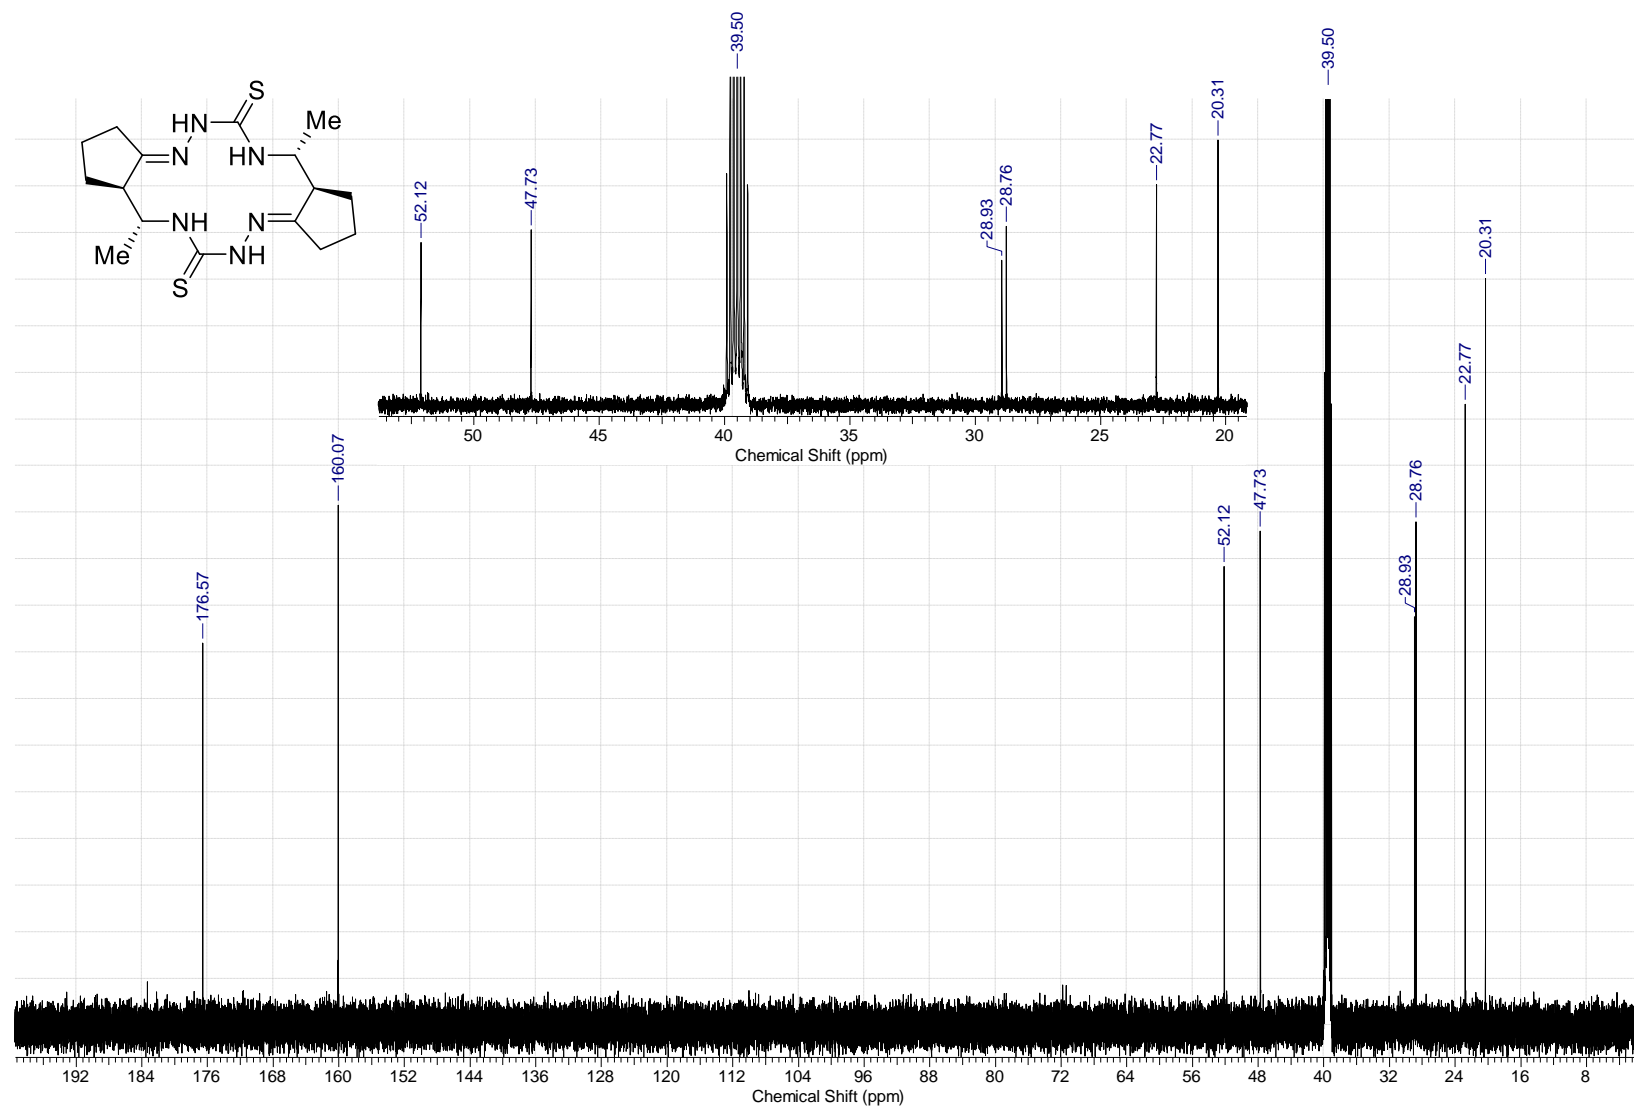

**Figure S3B.**  $^{13}\text{C}$  NMR spectrum of  $(5R^*,6R^*,12R^*,13R^*)$ -**6** (150.90 MHz,  $\text{DMSO-}d_6$ )

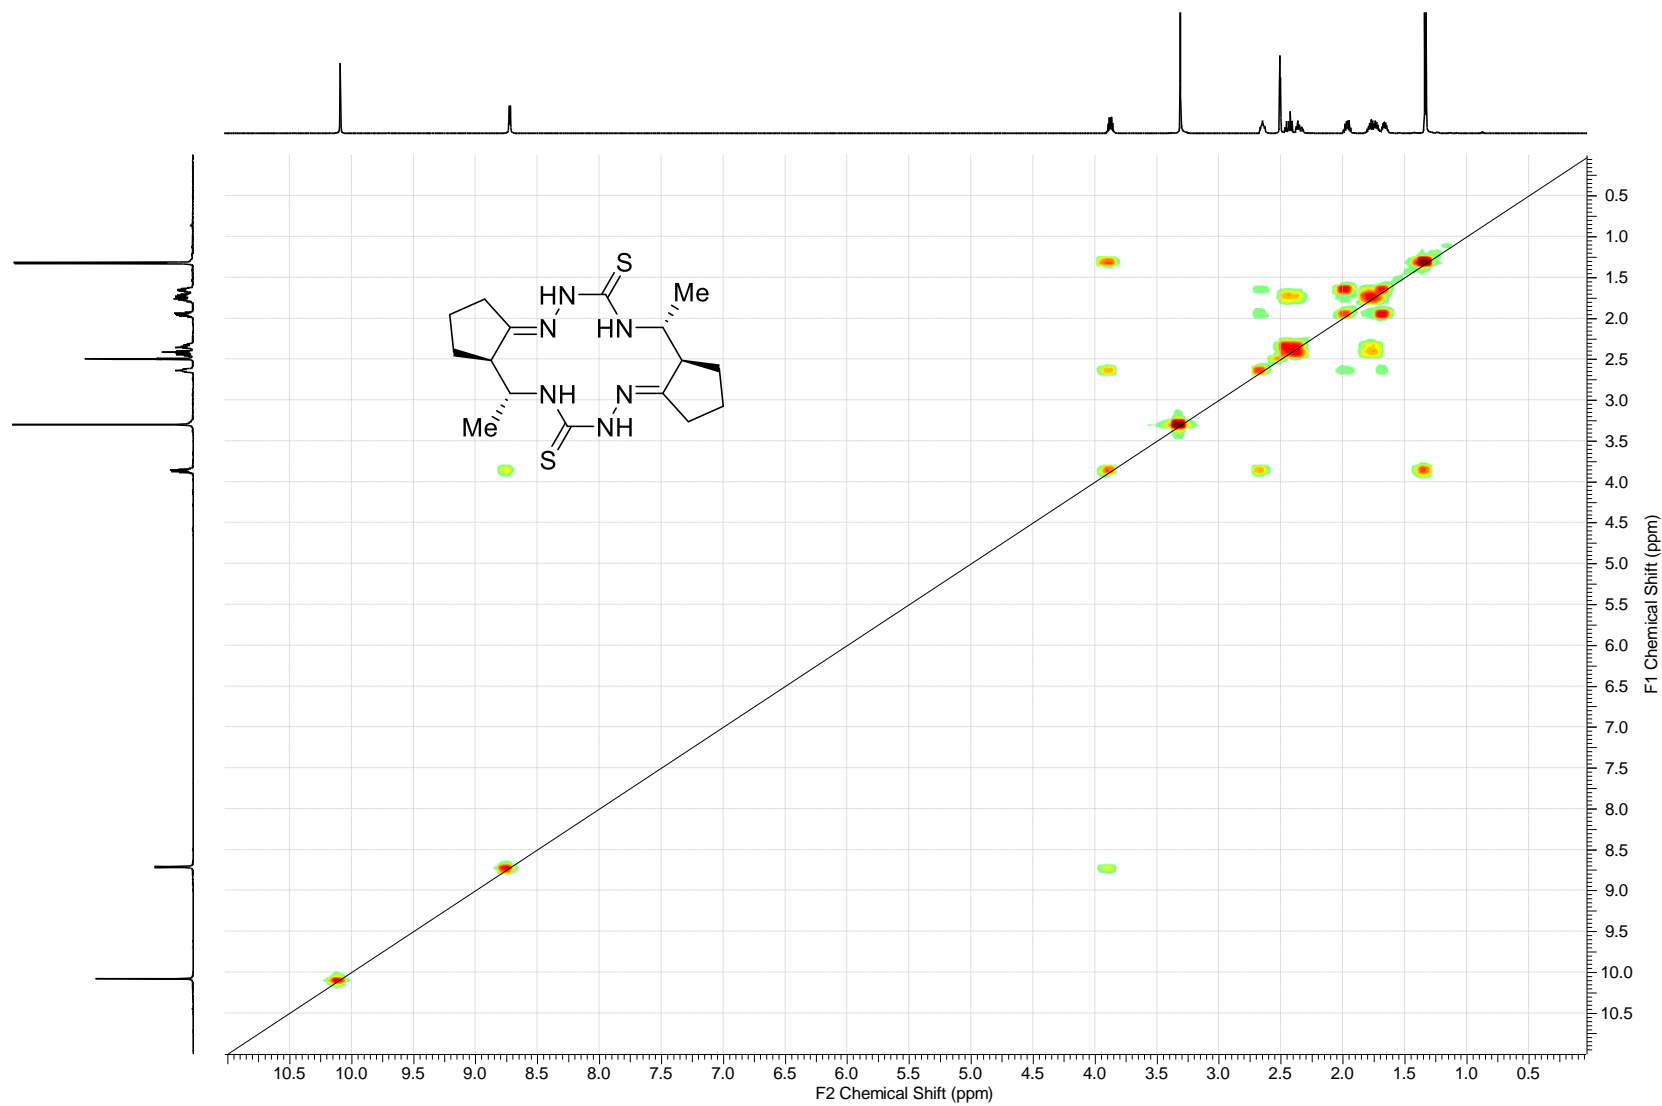

**Figure S3C.**  $^1\text{H}$ ,  $^1\text{H}$  COSY spectrum of  $(5R^*,6R^*,12R^*,13R^*)$ -**6** (150.90 MHz,  $\text{DMSO-}d_6$ )

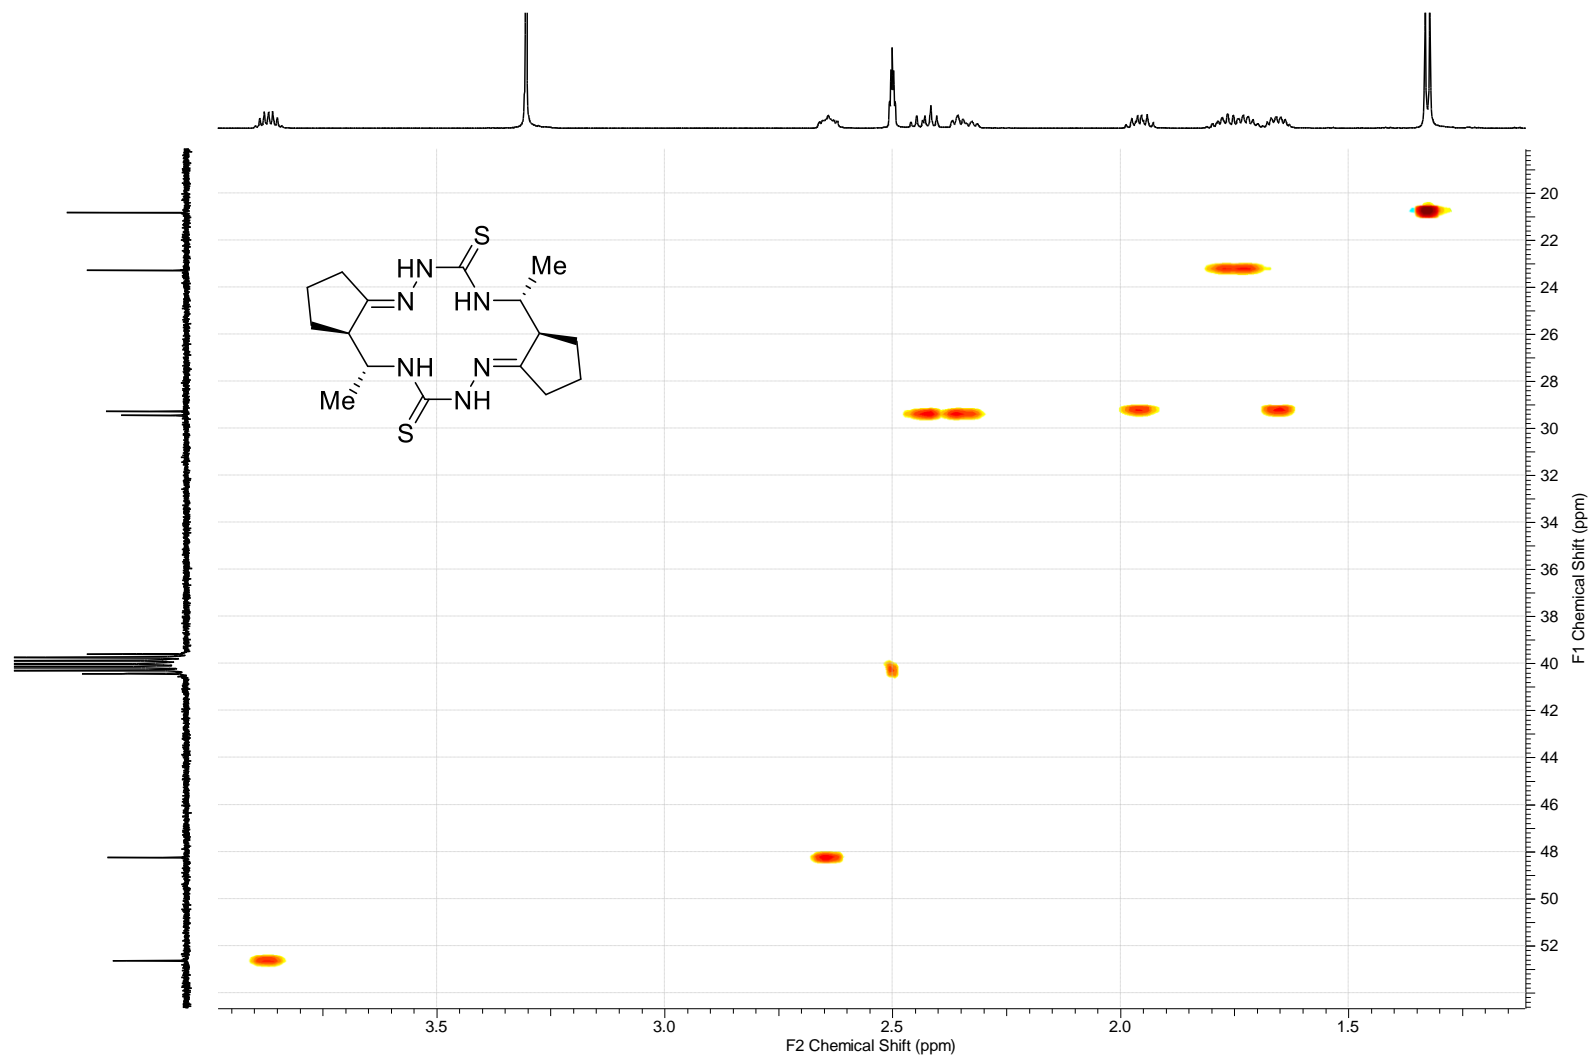

**Figure S3D.**  $^1\text{H}$ ,  $^{13}\text{C}$  HSQC spectrum of  $(5R^*,6R^*,12R^*,13R^*)$ -6 (Bruker Avance III,  $\text{DMSO-}d_6$ )



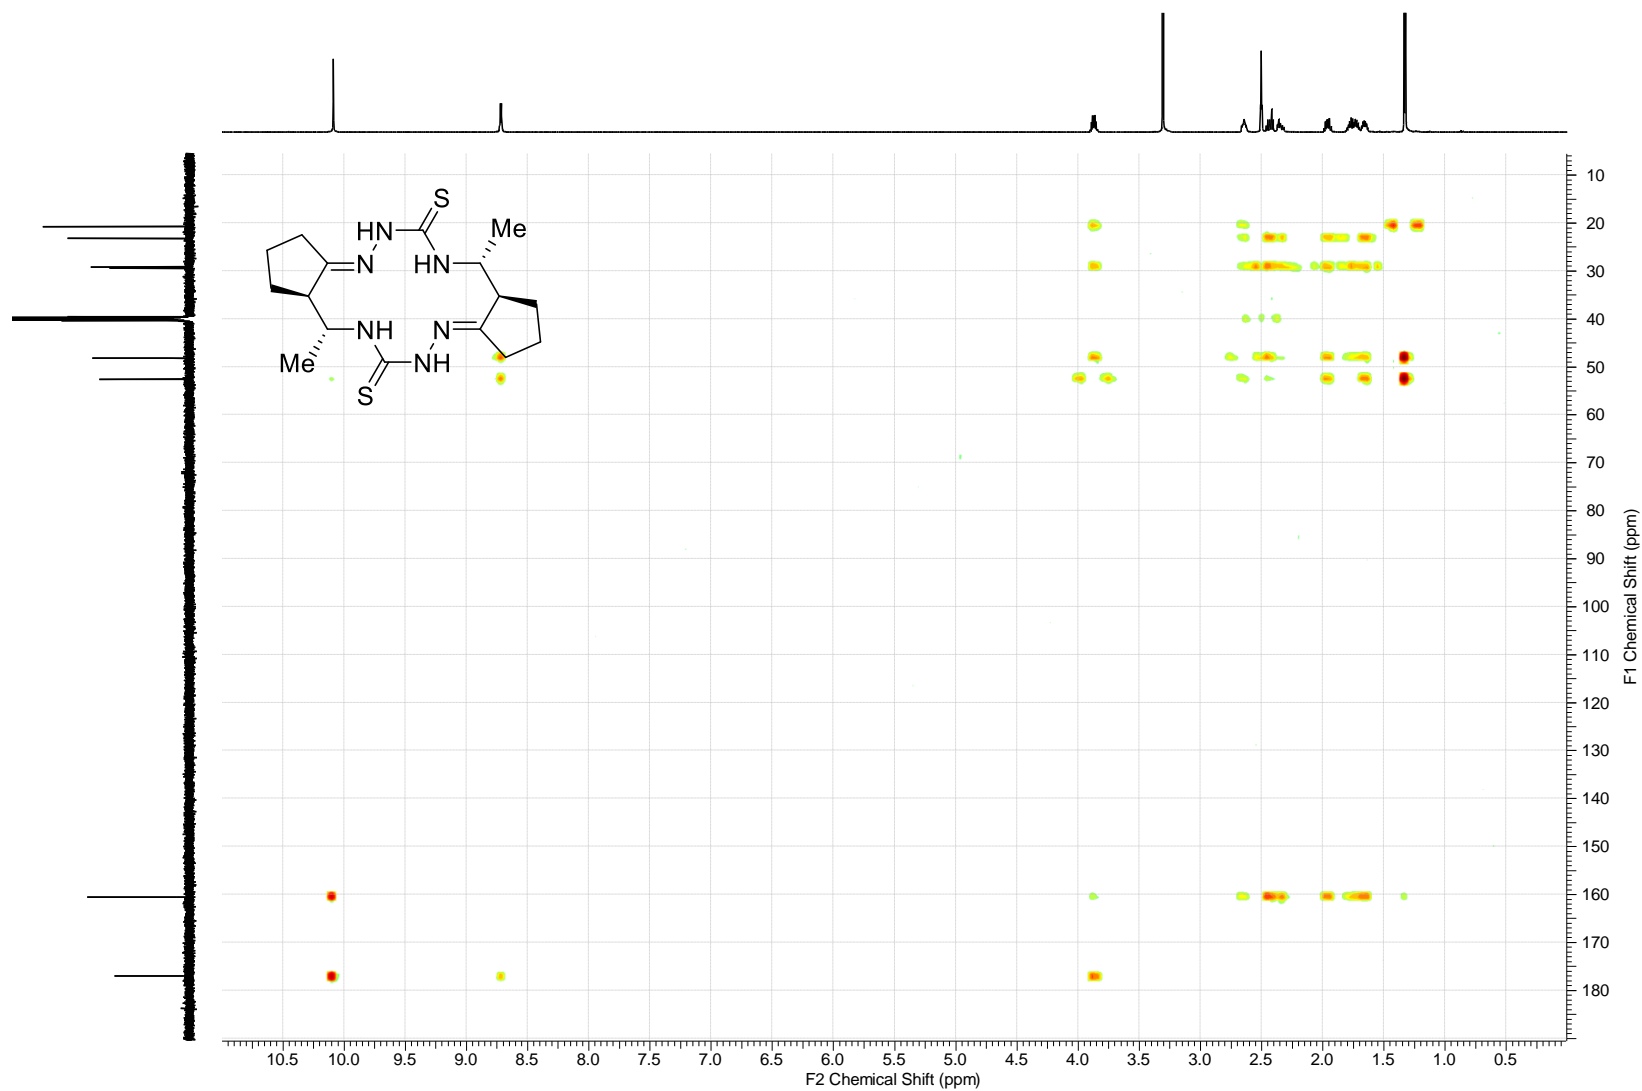

Figure S3E.  $^1\text{H}$ ,  $^{13}\text{C}$  HMBC spectrum of  $(5R^*,6R^*,12R^*,13R^*)$ -6 (Bruker Avance III,  $\text{DMSO-}d_6$ )

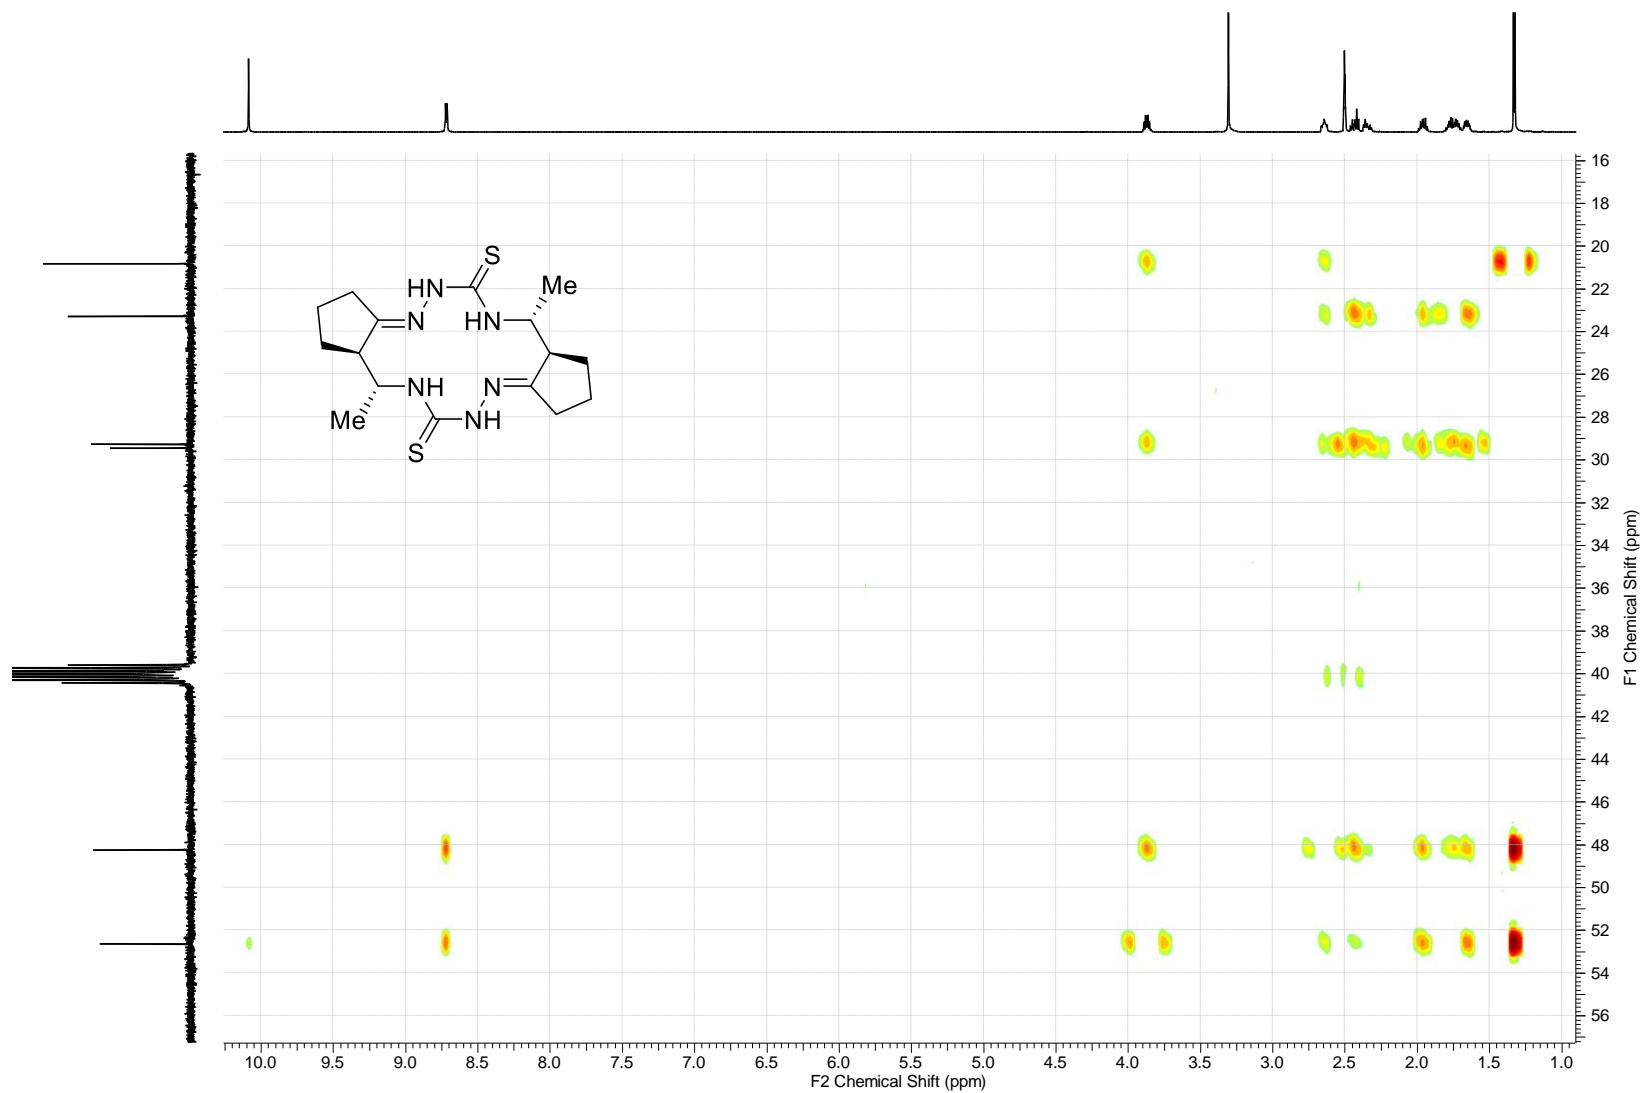

Figure S3F. Fragment of  $^1\text{H}$ ,  $^{13}\text{C}$  HMBC spectrum of  $(5R^*,6R^*,12R^*,13R^*)$ -6 (Bruker Avance III,  $\text{DMSO-}d_6$ )

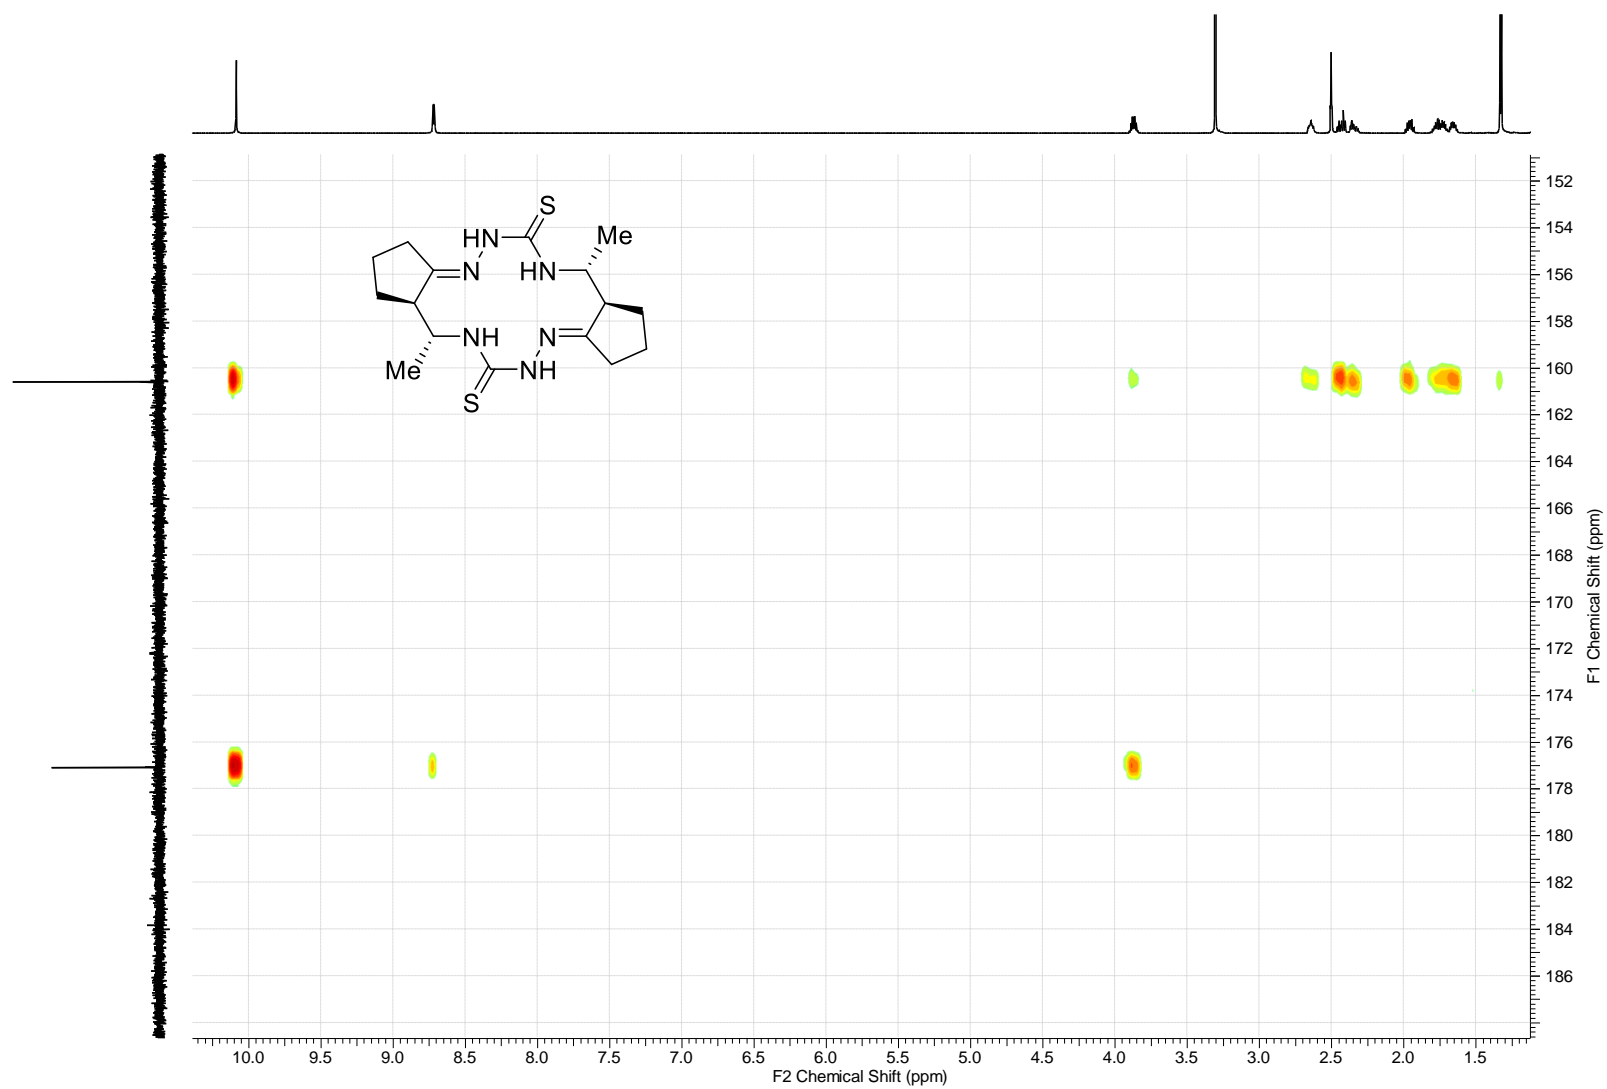

**Figure S3G.** Fragment of  $^1\text{H}$ ,  $^{13}\text{C}$  HMBC spectrum of  $(5R^*,6R^*,12R^*,13R^*)$ -**6** (Bruker Avance III,  $\text{DMSO-}d_6$ )

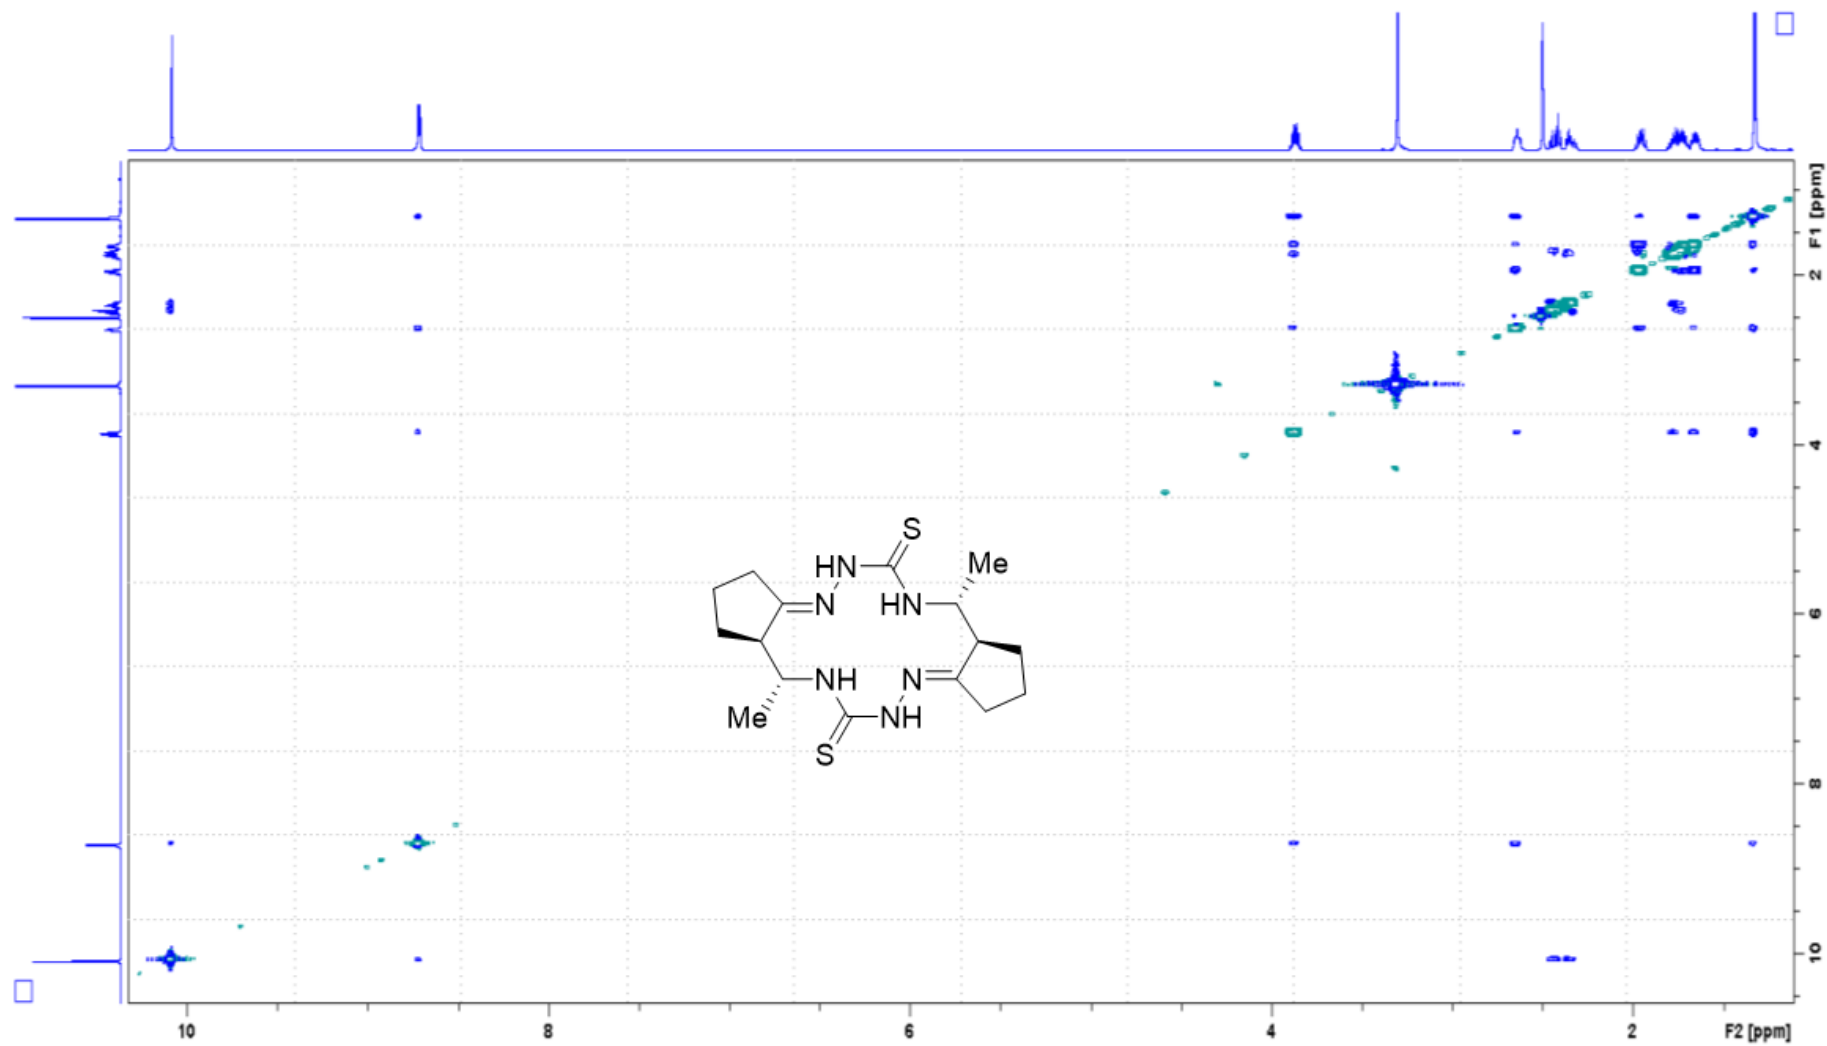

**Figure S3H.**  $^1\text{H}$ ,  $^1\text{H}$  NOESY spectrum of  $(5R^*,6R^*,12R^*,13R^*)$ -**6** (600.13 MHz,  $\text{DMSO-}d_6$ )

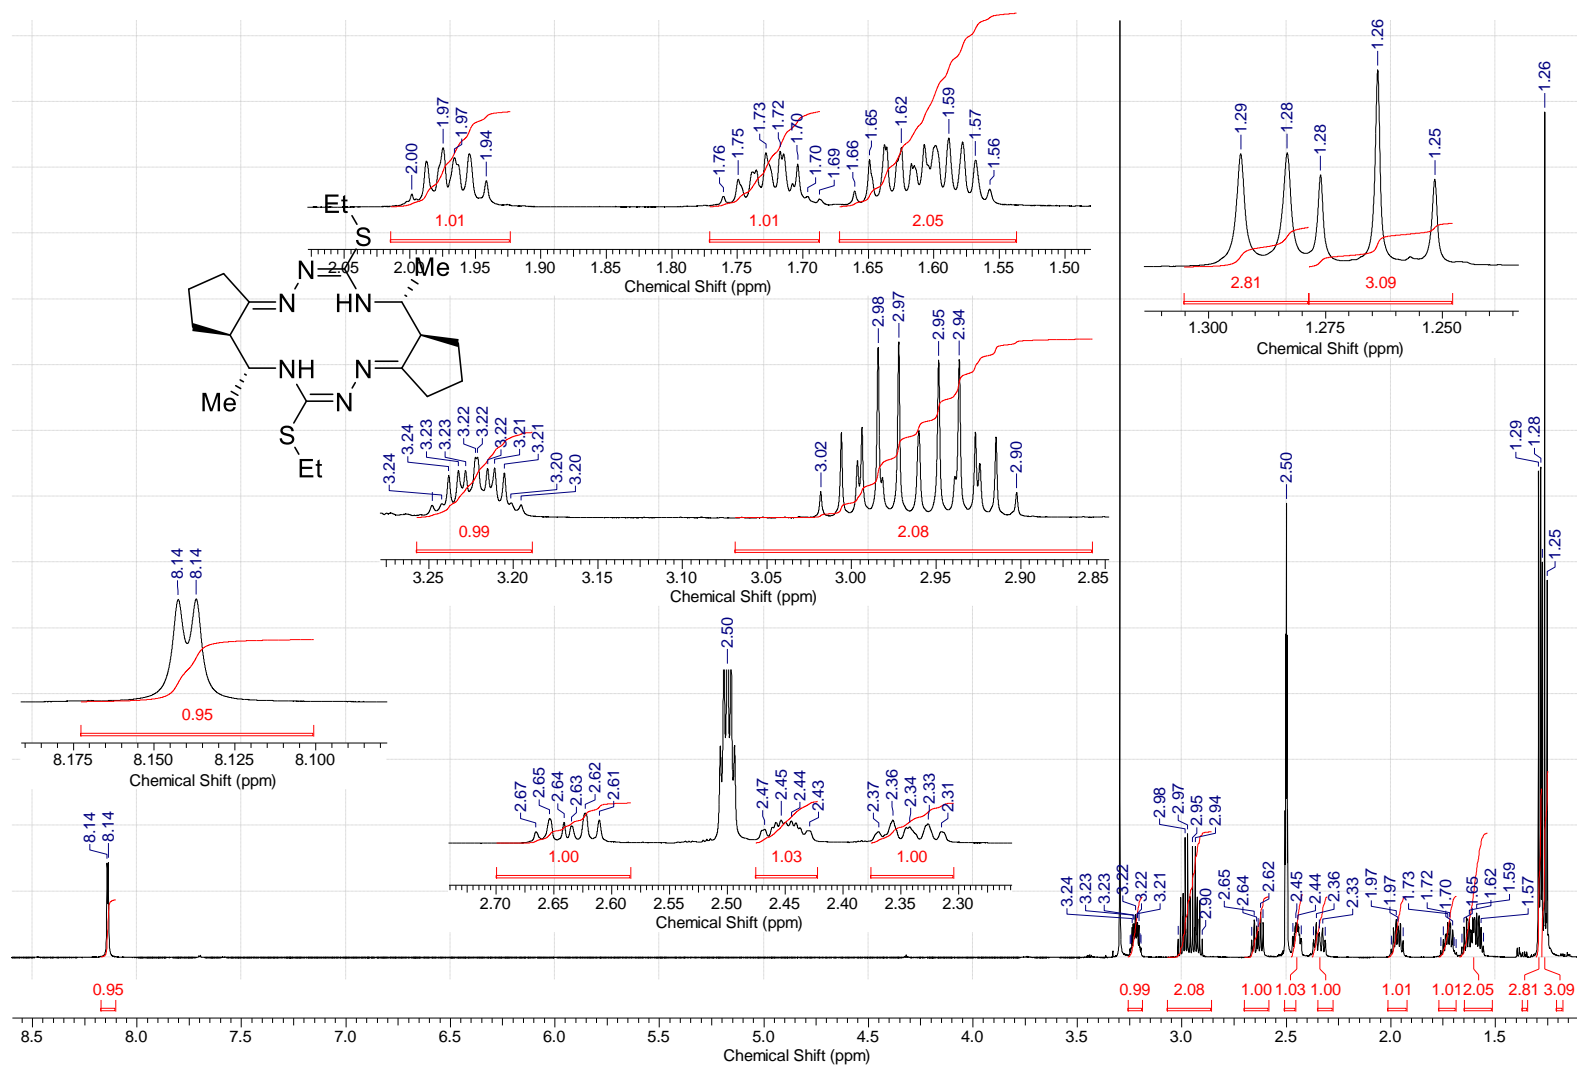

**Figure S4A.** <sup>1</sup>H NMR spectrum of (5*R*\*,6*R*\*,12*R*\*,13*R*\*)-8 (600.13 MHz, DMSO-*d*<sub>6</sub>)

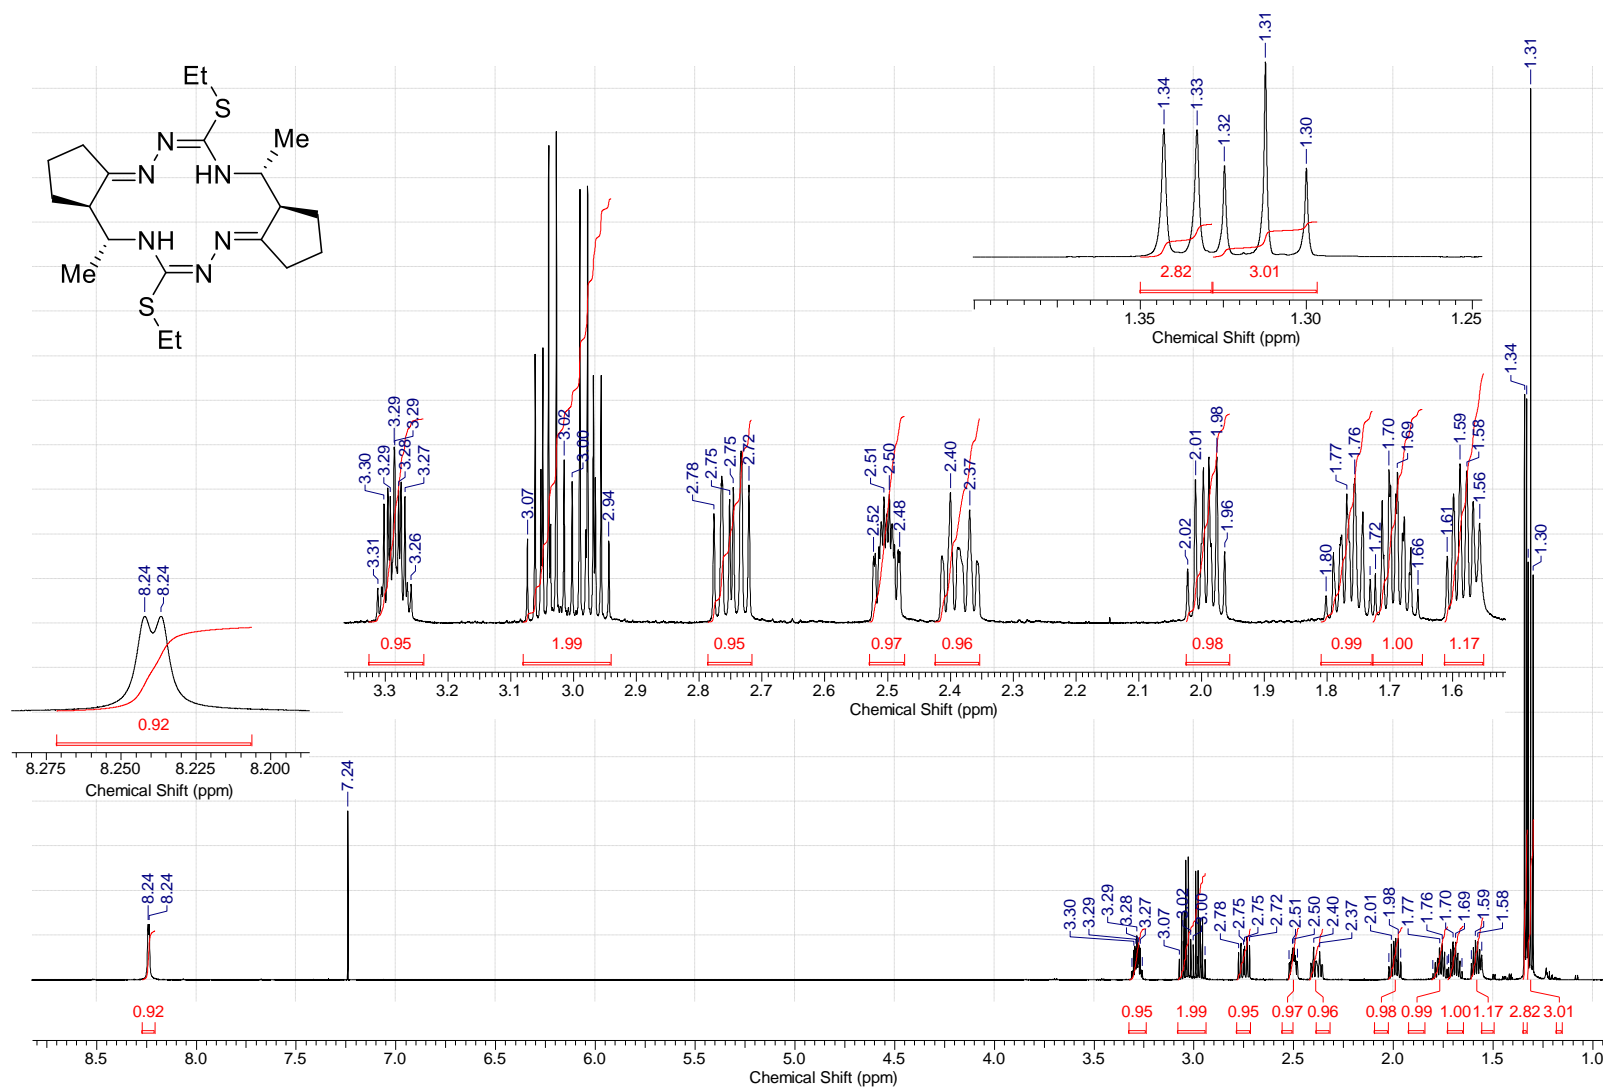

**Figure S4B.**  $^1\text{H}$  NMR spectrum of  $(5R^*,6R^*,12R^*,13R^*)$ -**8** (600.13 MHz,  $\text{CDCl}_3$ ).

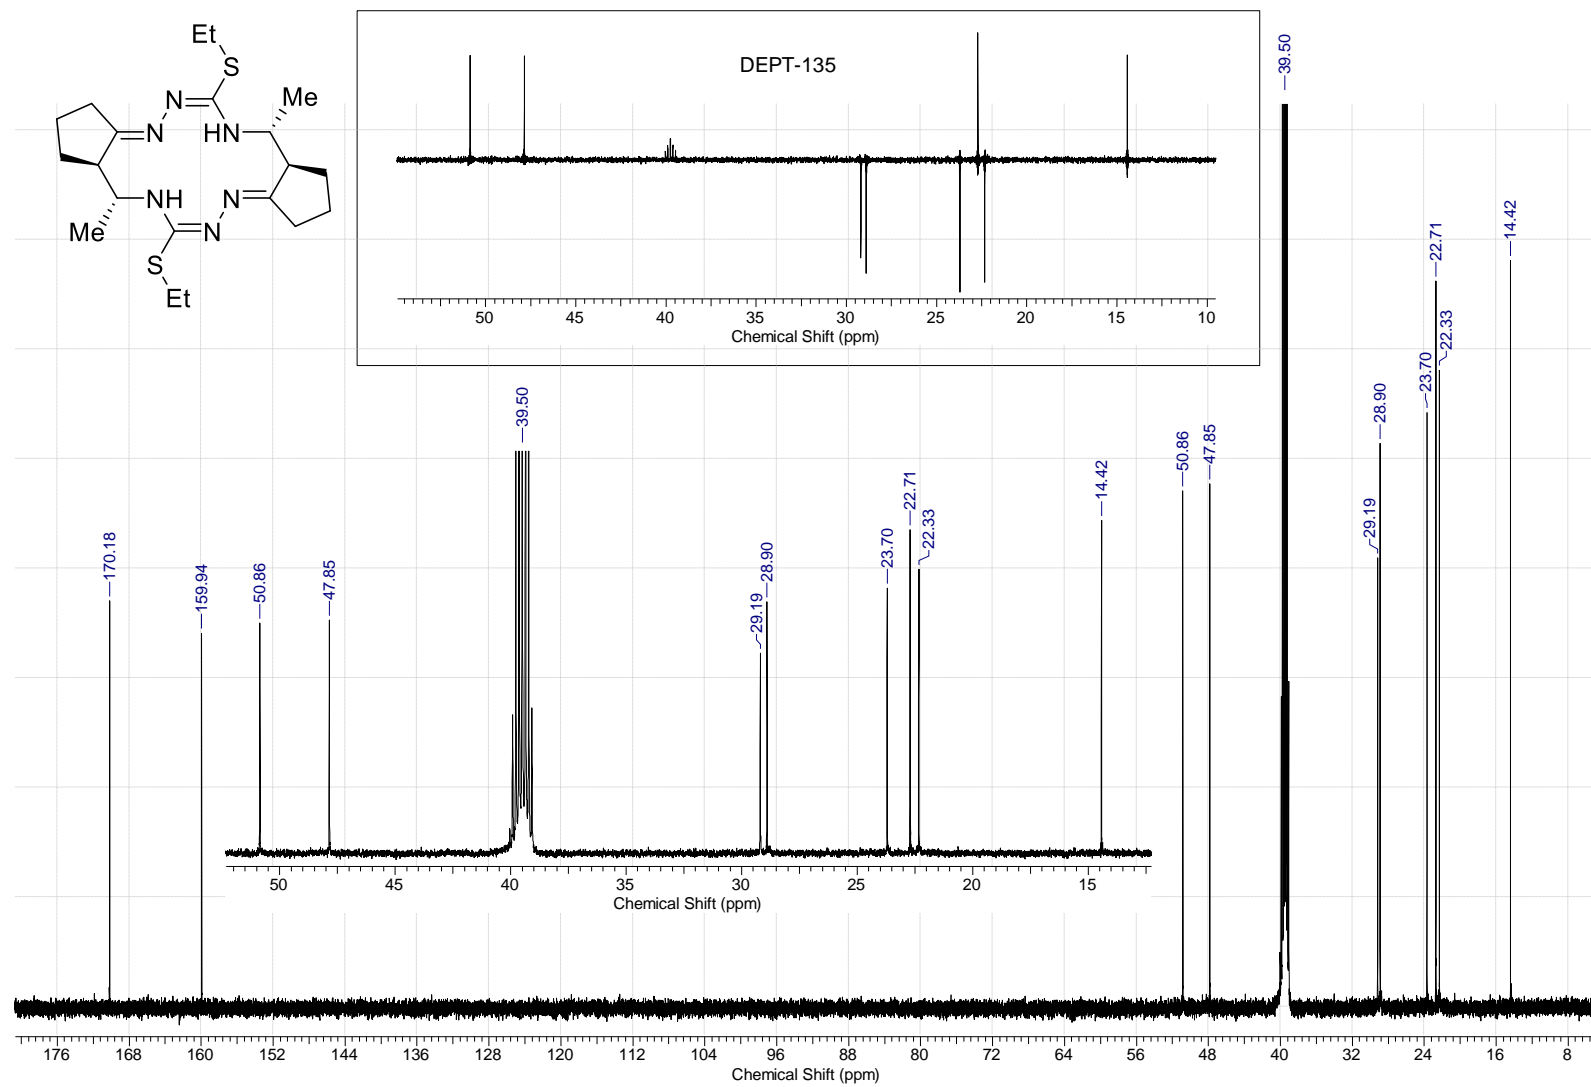

**Figure S4C.**  $^{13}\text{C}$  NMR spectrum of  $(5R^*,6R^*,12R^*,13R^*)$ -**8** (150.90 MHz,  $\text{DMSO-}d_6$ ).

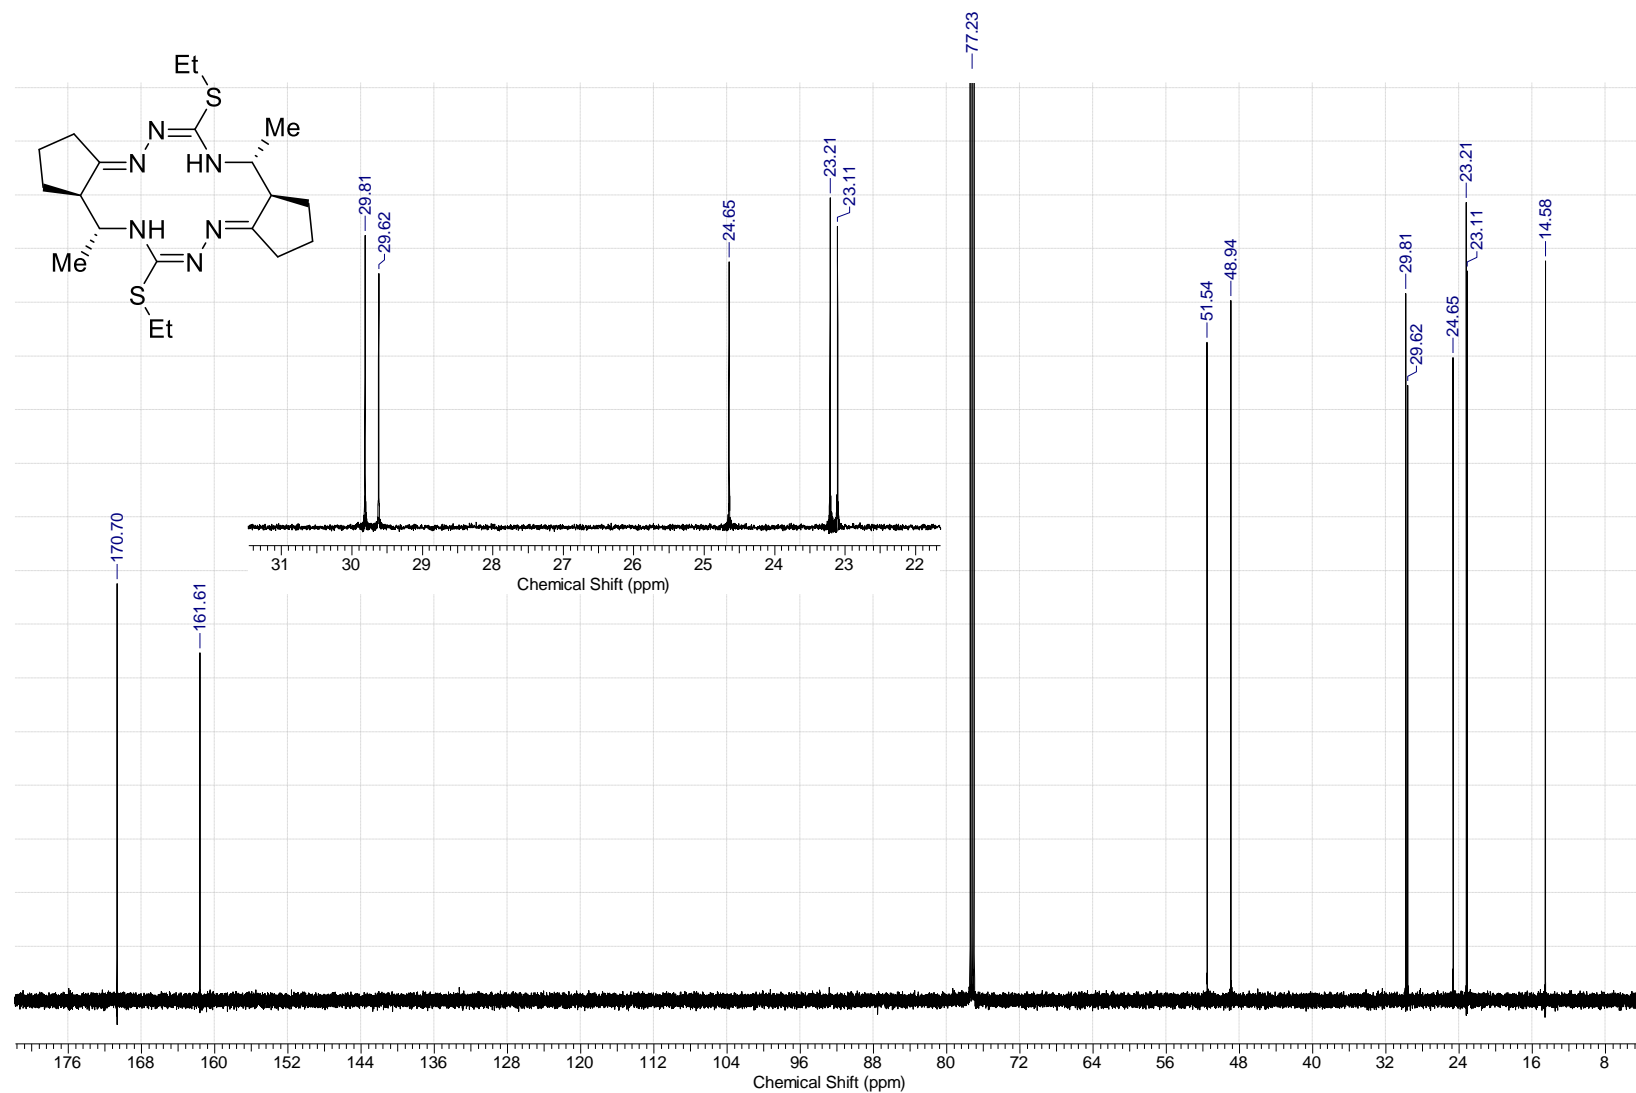

**Figure S4D.** <sup>13</sup>C NMR spectrum of (5R\*,6R\*,12R\*,13R\*)-8 (150.90 MHz, CDCl<sub>3</sub>).



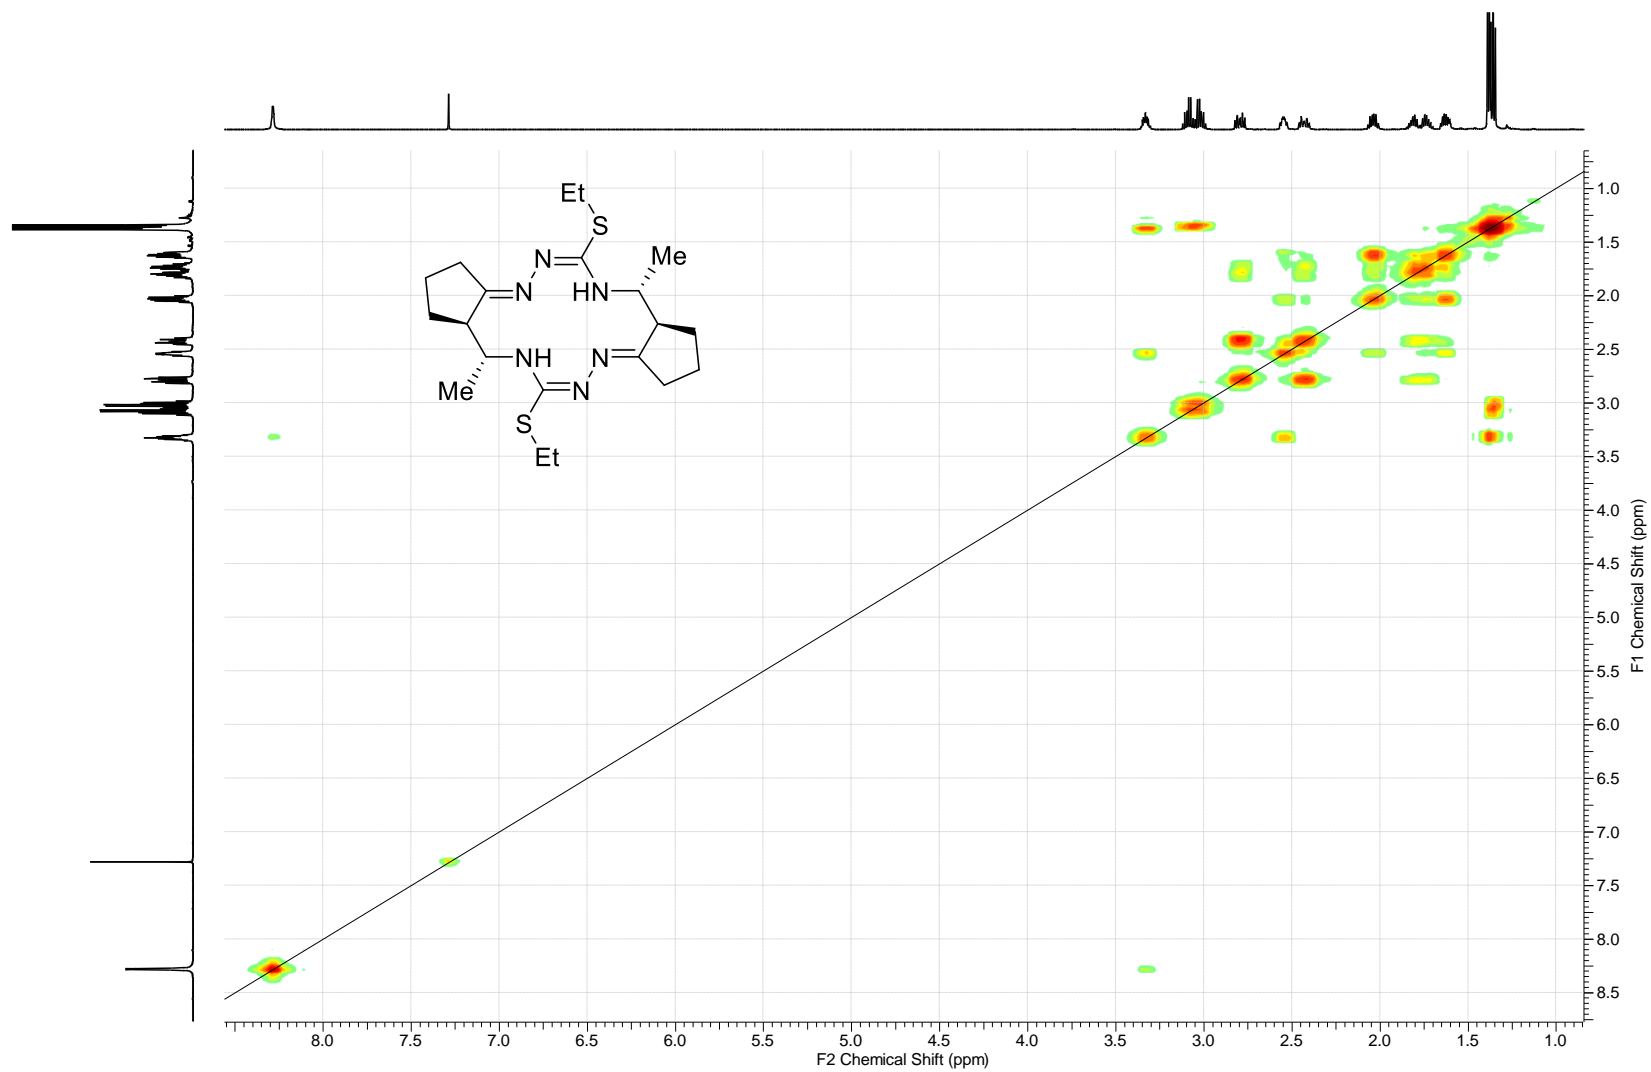

**Figure S4E.**  $^1\text{H}$ ,  $^1\text{H}$  COSY spectrum of  $(5R^*,6R^*,12R^*,13R^*)$ -**8** (150.90 MHz,  $\text{CDCl}_3$ ).

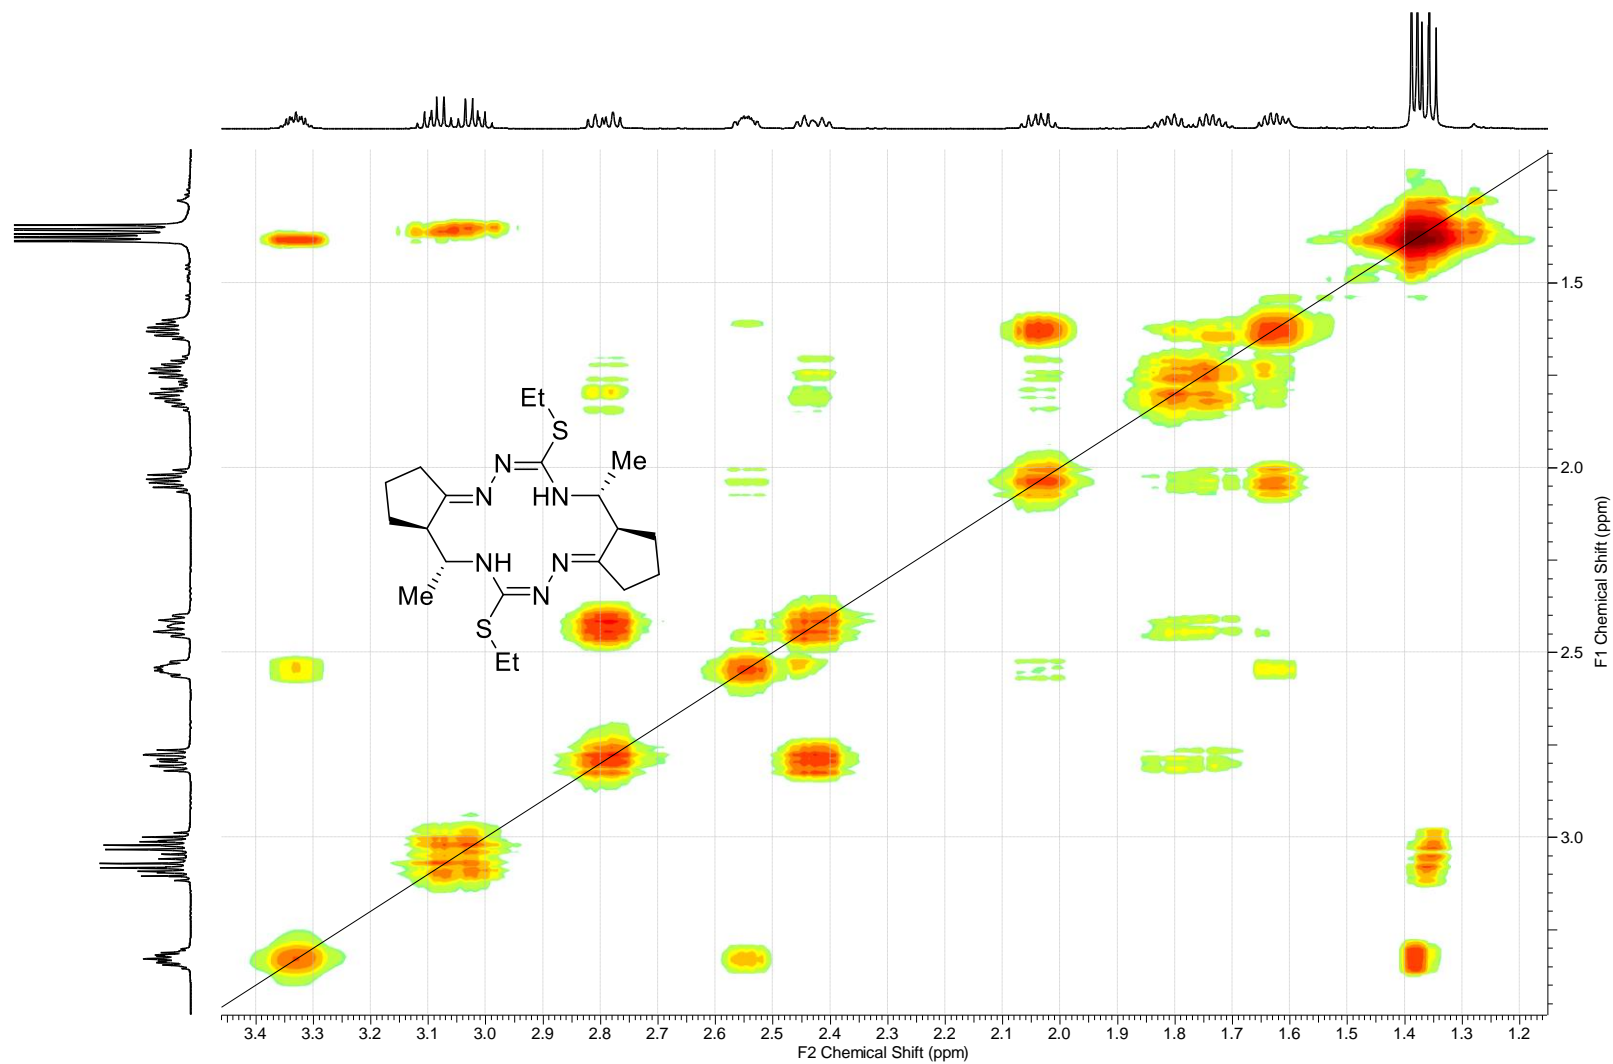

**Figure S4F.** Fragment of <sup>1</sup>H,<sup>1</sup>H COSY spectrum of (5*R*\*,6*R*\*,12*R*\*,13*R*\*)-8 (150.90 MHz, CDCl<sub>3</sub>).

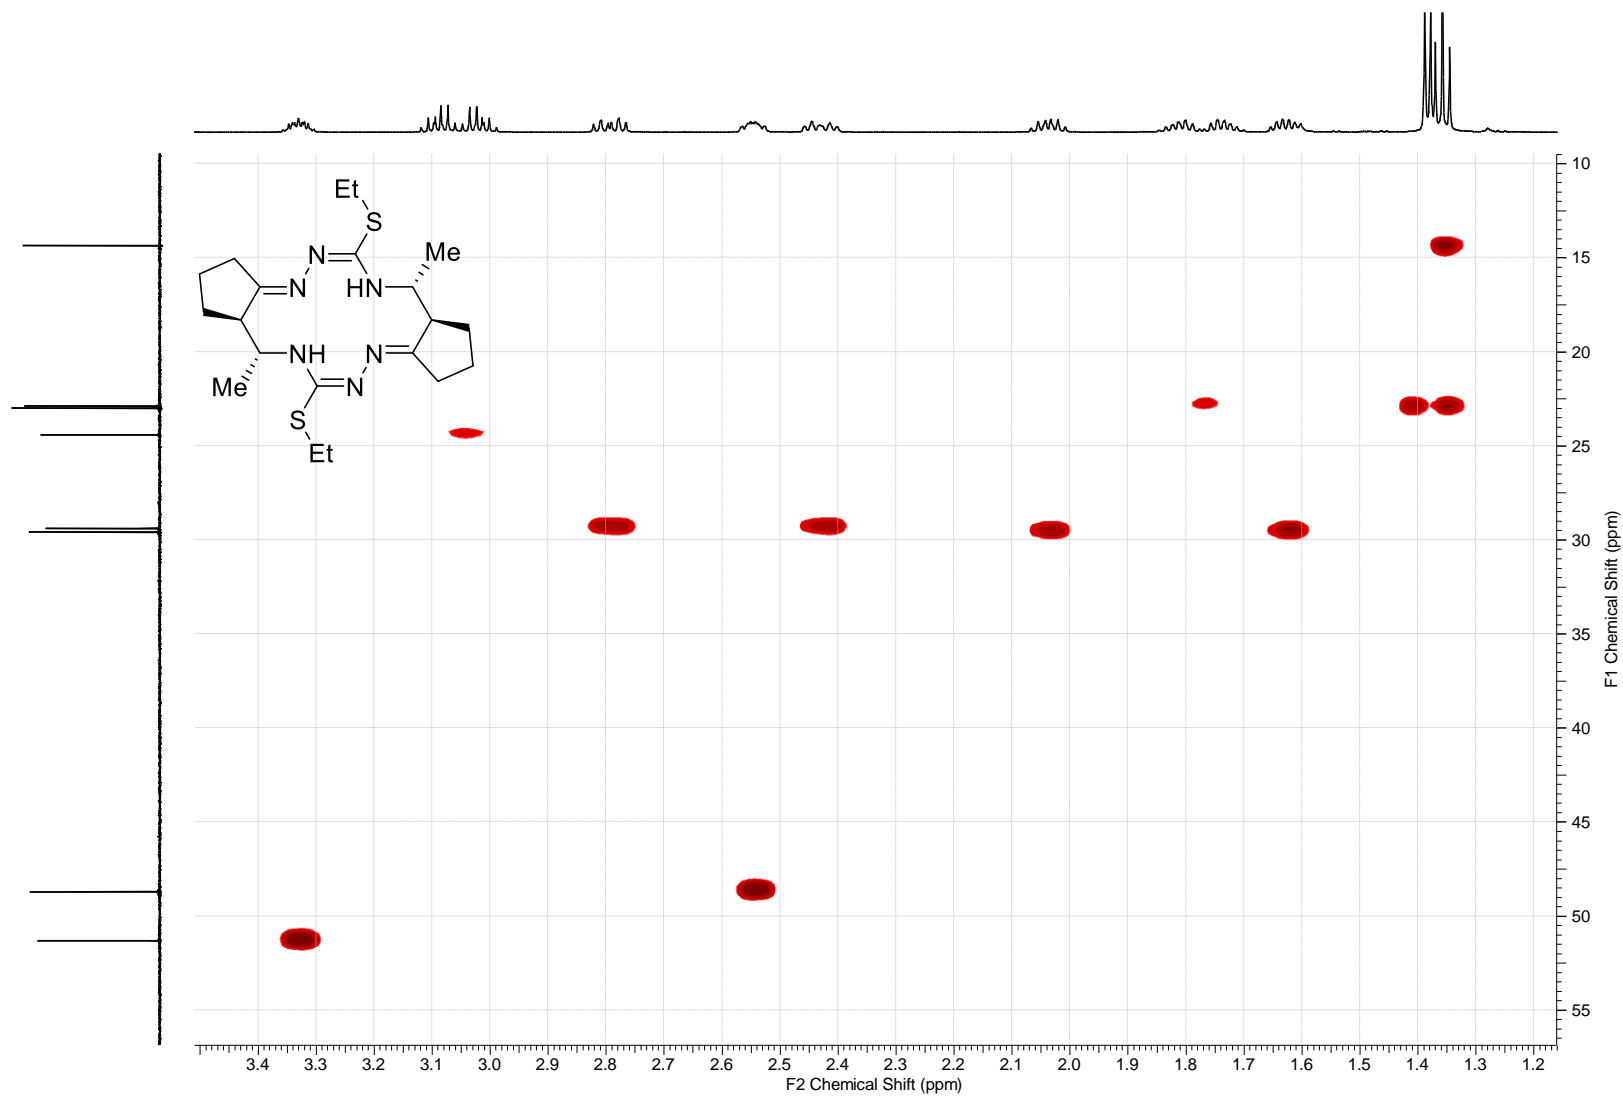

**Figure S4G.**  $^1\text{H}$ ,  $^{13}\text{C}$  HSQC spectrum of  $(5R^*,6R^*,12R^*,13R^*)$ -**8** (Bruker Avance III,  $\text{CDCl}_3$ ).

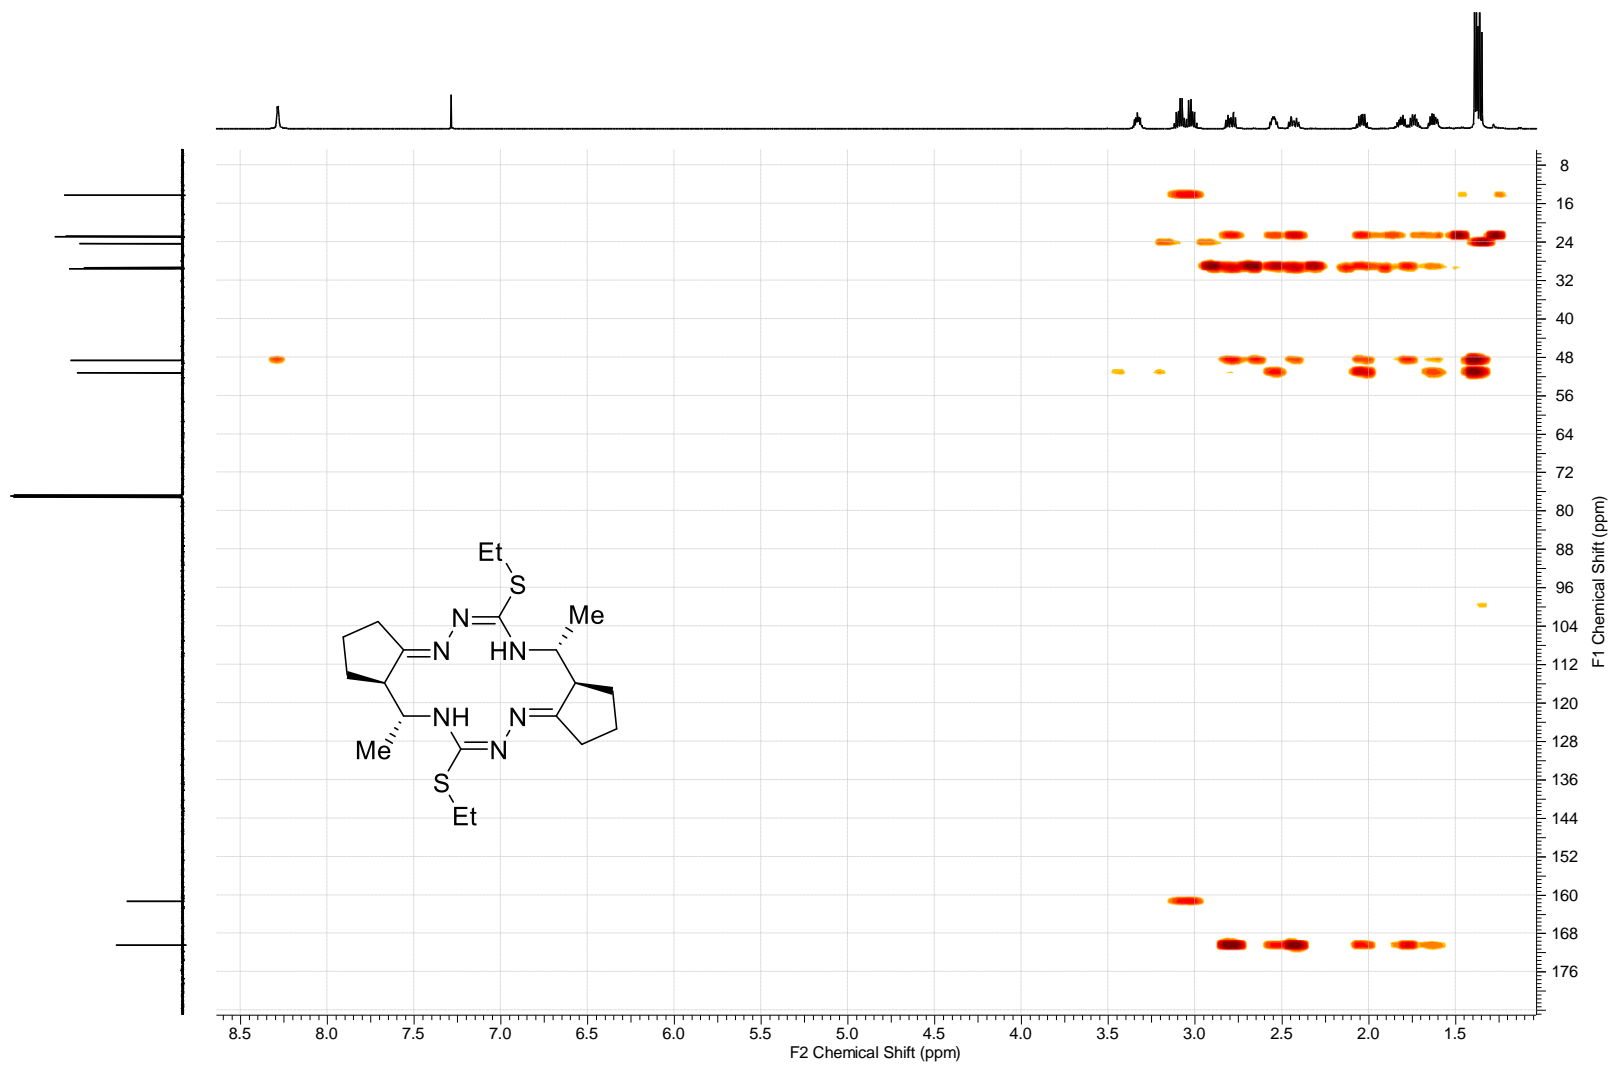

**Figure S4H.**  $^1\text{H}$ ,  $^{13}\text{C}$  HMBC spectrum of (5*R*\*,6*R*\*,12*R*\*,13*R*\*)-8 (Bruker Avance III,  $\text{CDCl}_3$ ).

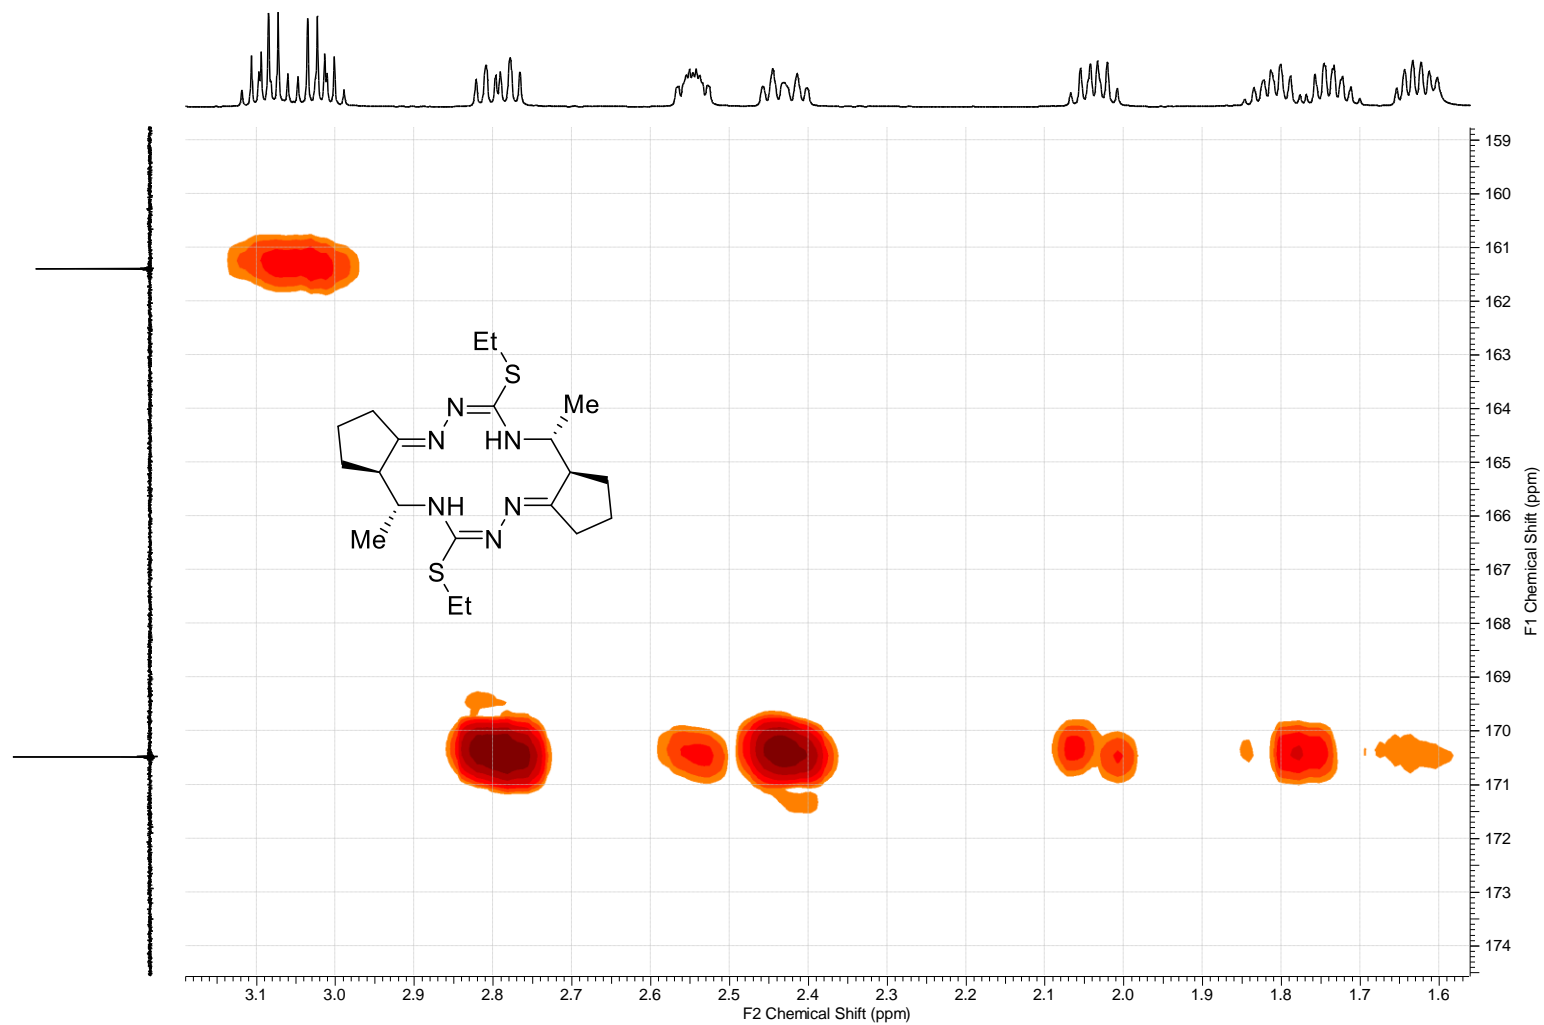

**Figure S4I.** Fragment of  $^1\text{H}$ ,  $^{13}\text{C}$  HMBC spectrum of  $(5R^*,6R^*,12R^*,13R^*)$ -**8** (Bruker Avance III,  $\text{CDCl}_3$ ).

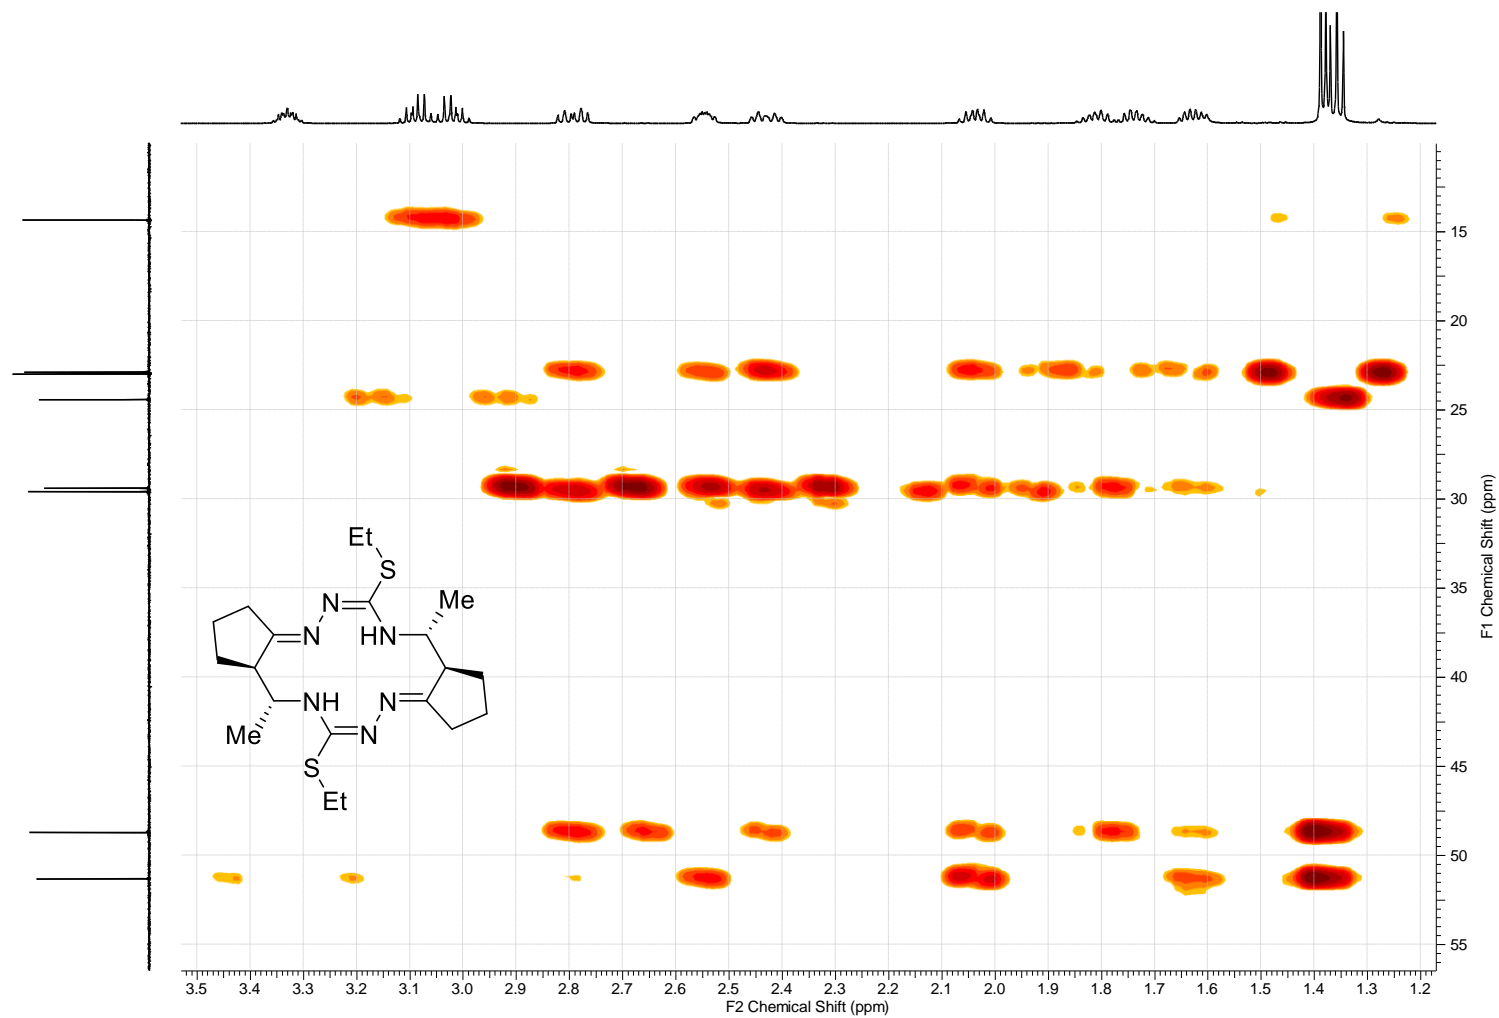

**Figure S4J.** Fragment of  $^1\text{H}$ ,  $^{13}\text{C}$  HMBC spectrum of  $(5R^*,6R^*,12R^*,13R^*)$ -8 (Bruker Avance III,  $\text{CDCl}_3$ ).

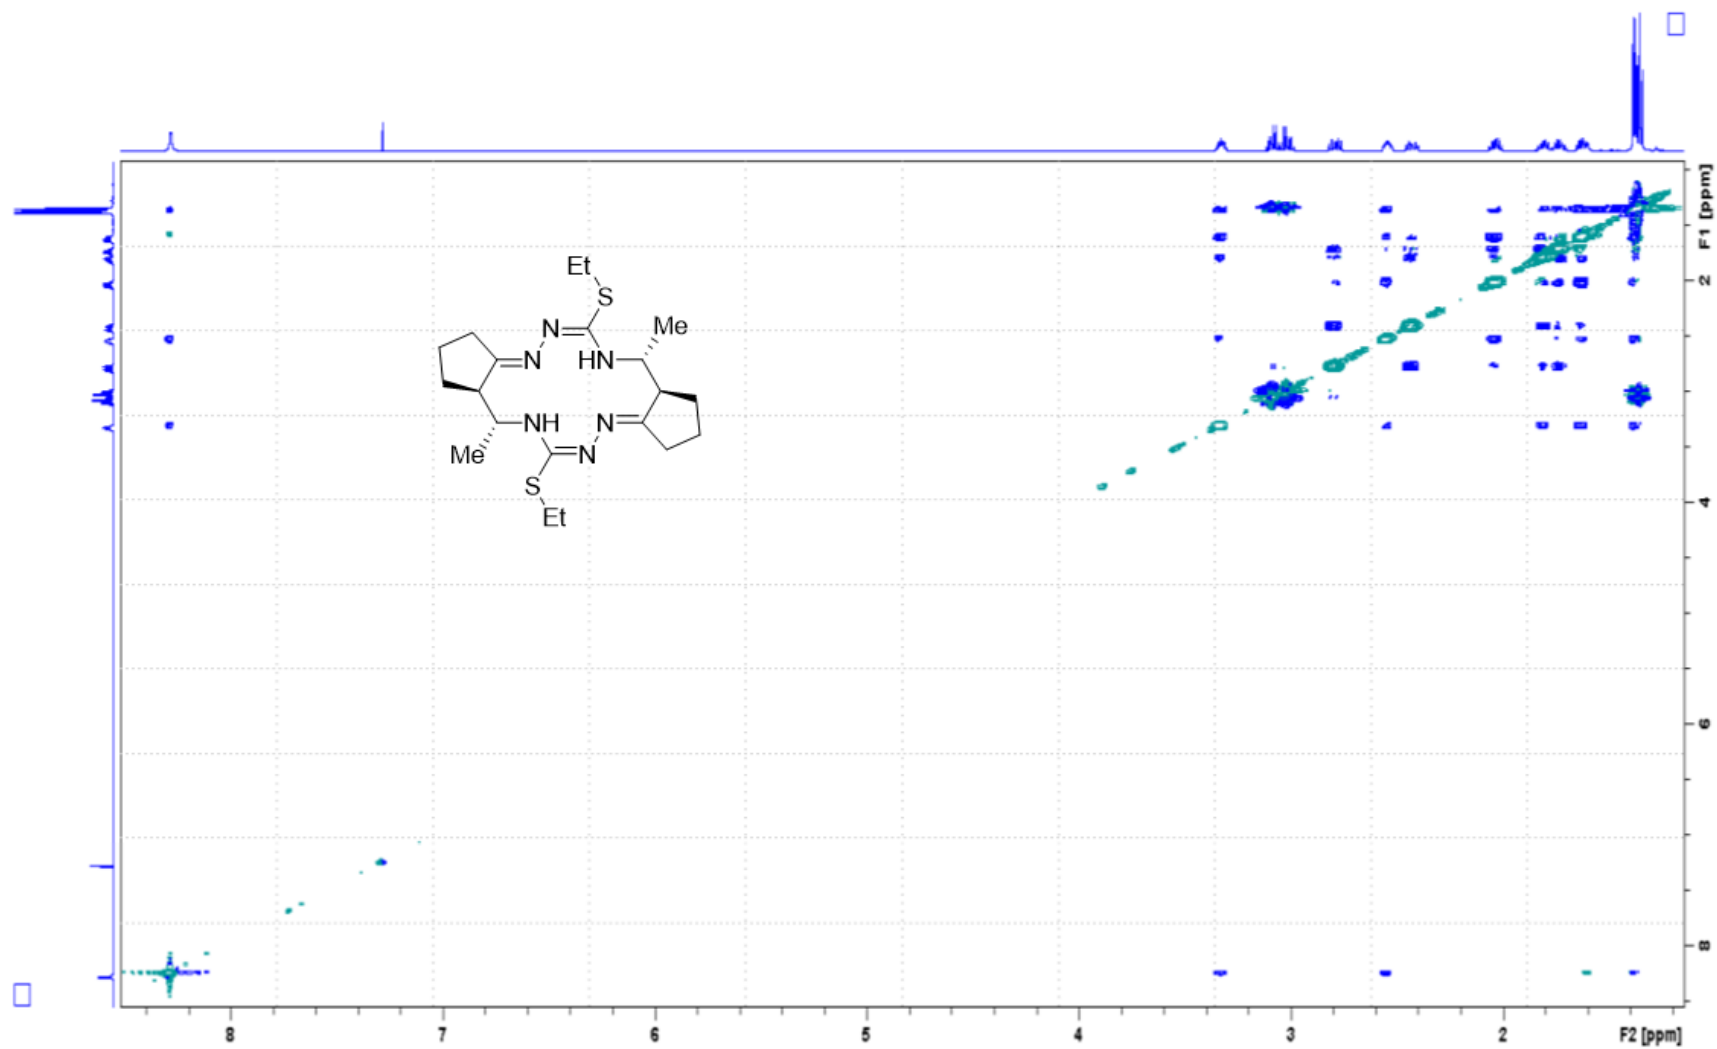

**Figure S4K.**  $^1\text{H}$ ,  $^1\text{H}$  NOESY spectrum of  $(5R^*,6R^*,12R^*,13R^*)$ -**8** (600.13 MHz,  $\text{CDCl}_3$ ).

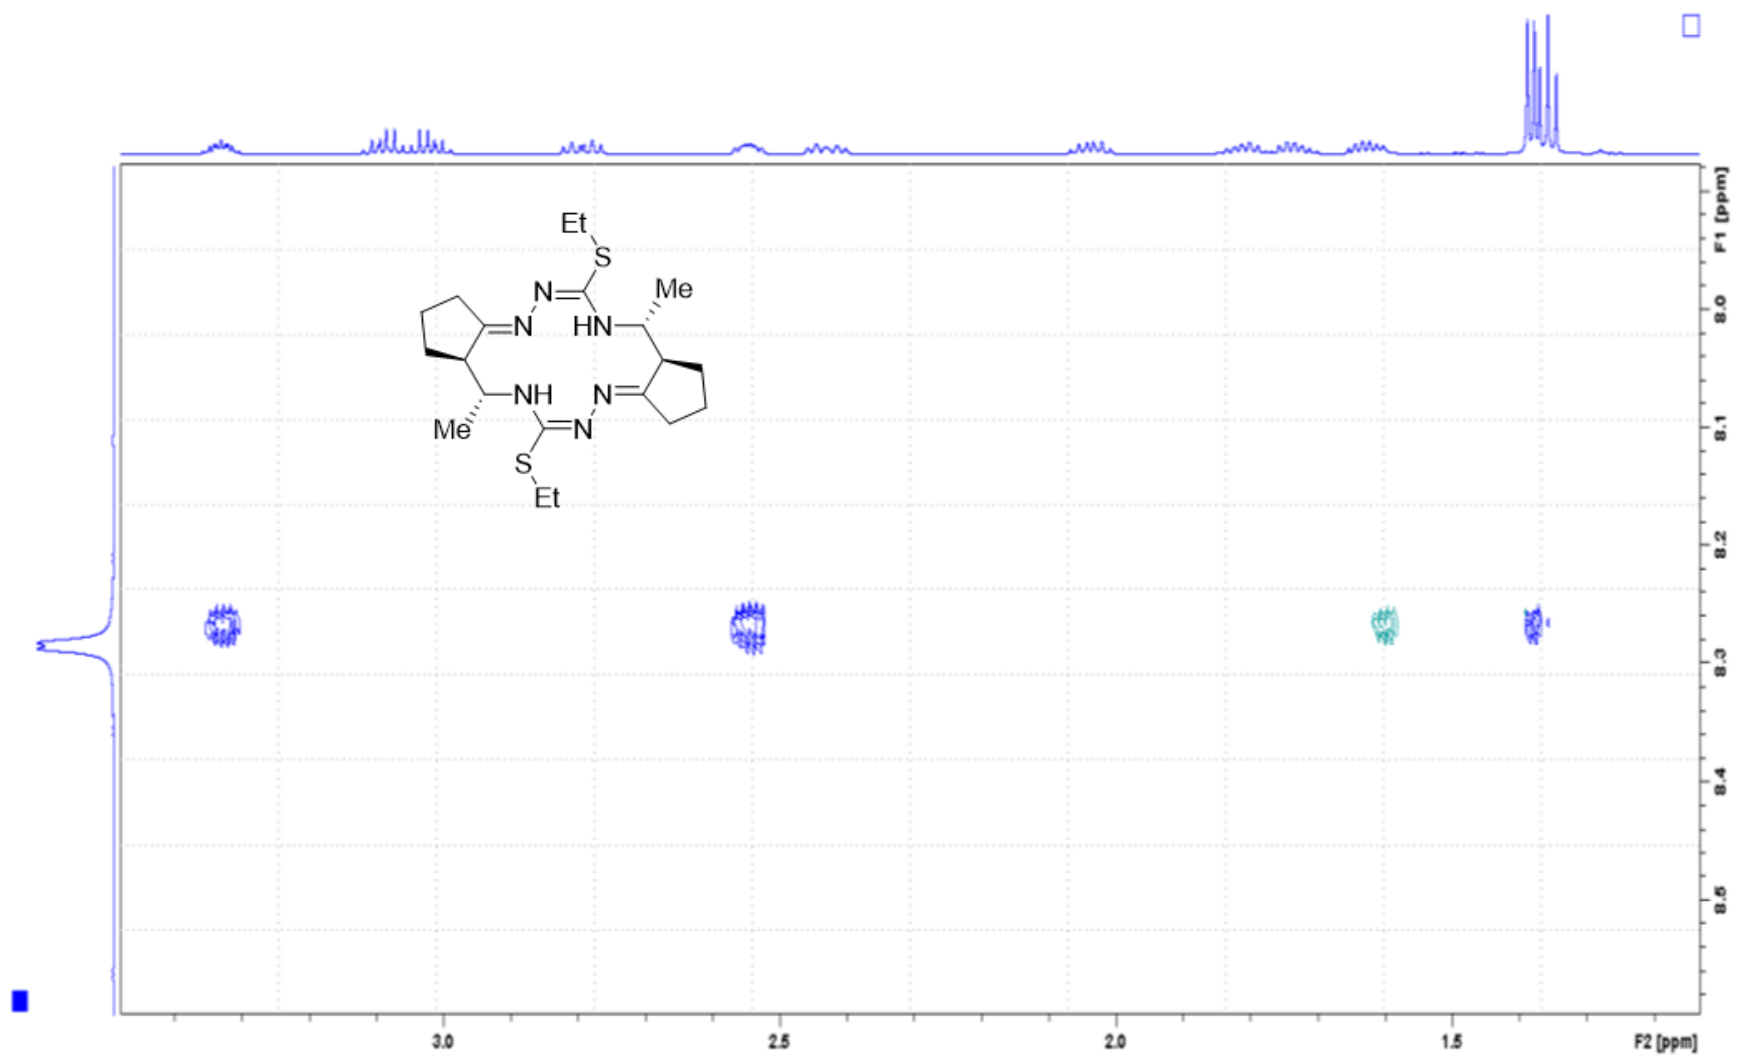

**Figure S4L.** Fragment of  $^1\text{H}$ ,  $^1\text{H}$  NOESY spectrum of  $(5R^*,6R^*,12R^*,13R^*)$ -**8** (600.13 MHz,  $\text{CDCl}_3$ ).



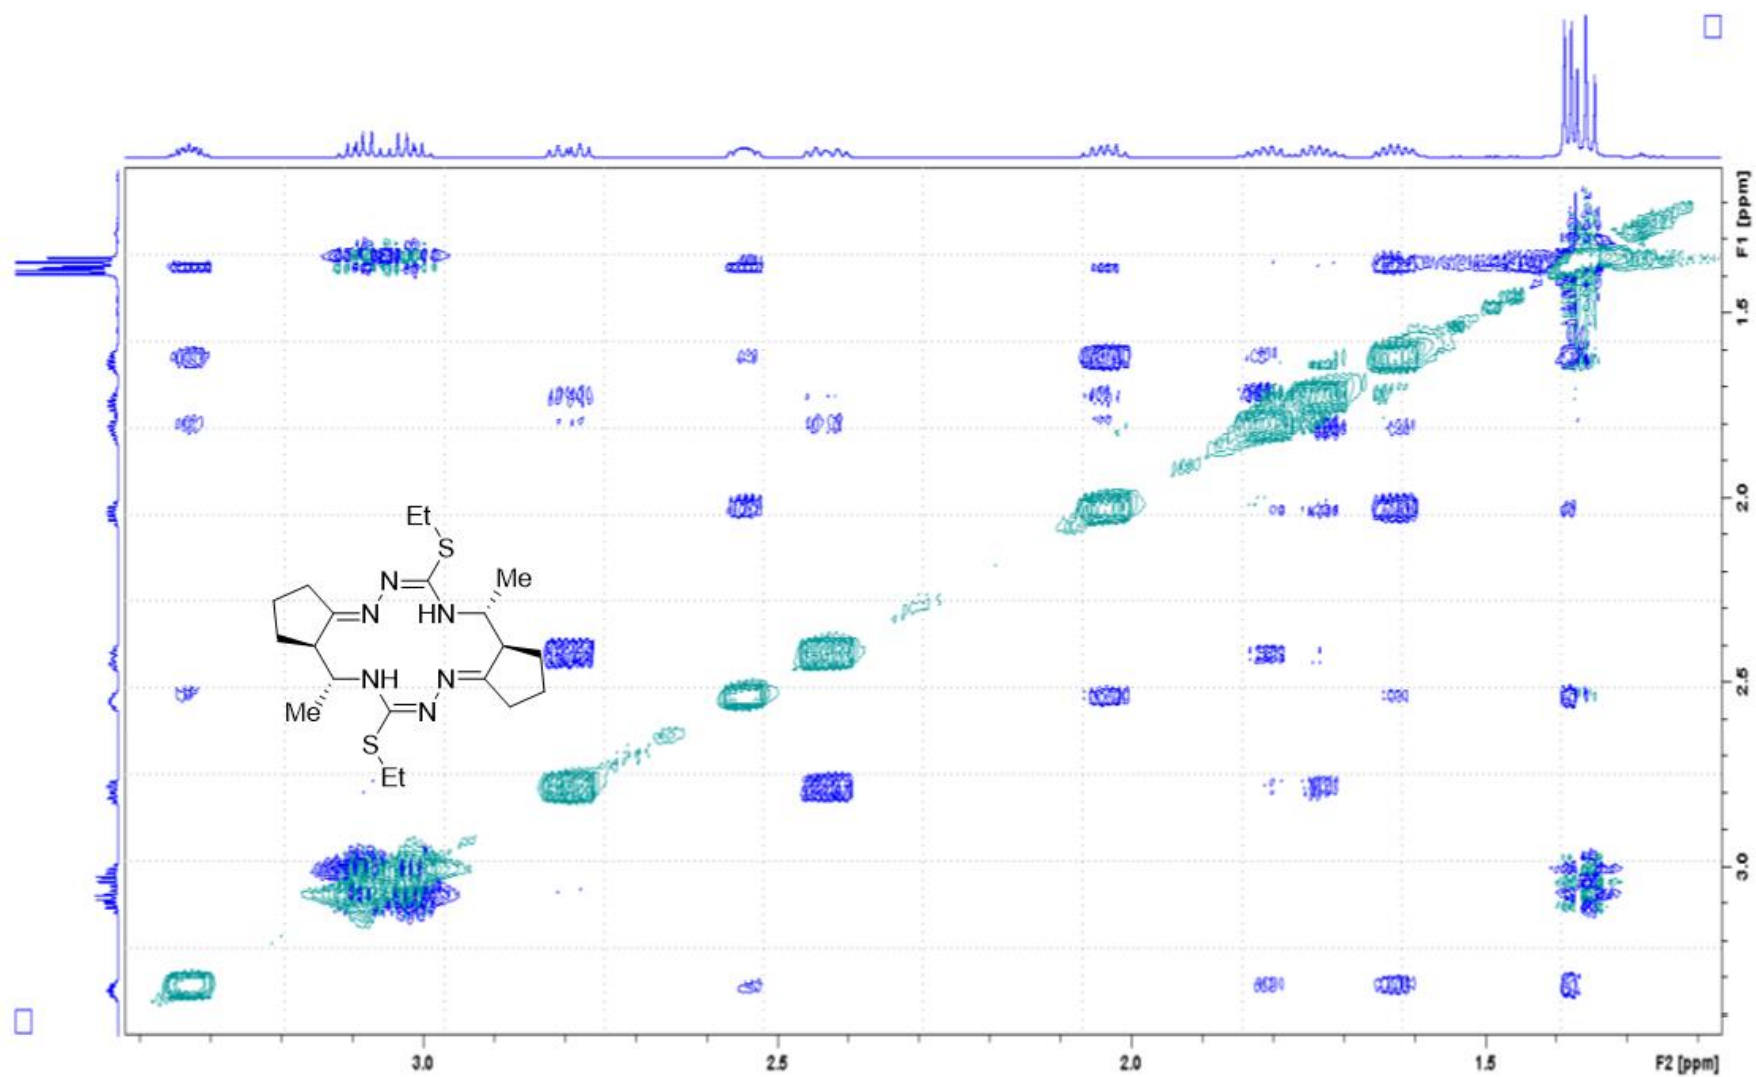

**Figure S4M.** Fragment of <sup>1</sup>H,<sup>1</sup>H NOESY spectrum of (5*R*\*,6*R*\*,12*R*\*,13*R*\*)-8 (600.13 MHz, CDCl<sub>3</sub>).

## 1.2. ESI-MS of the ligands

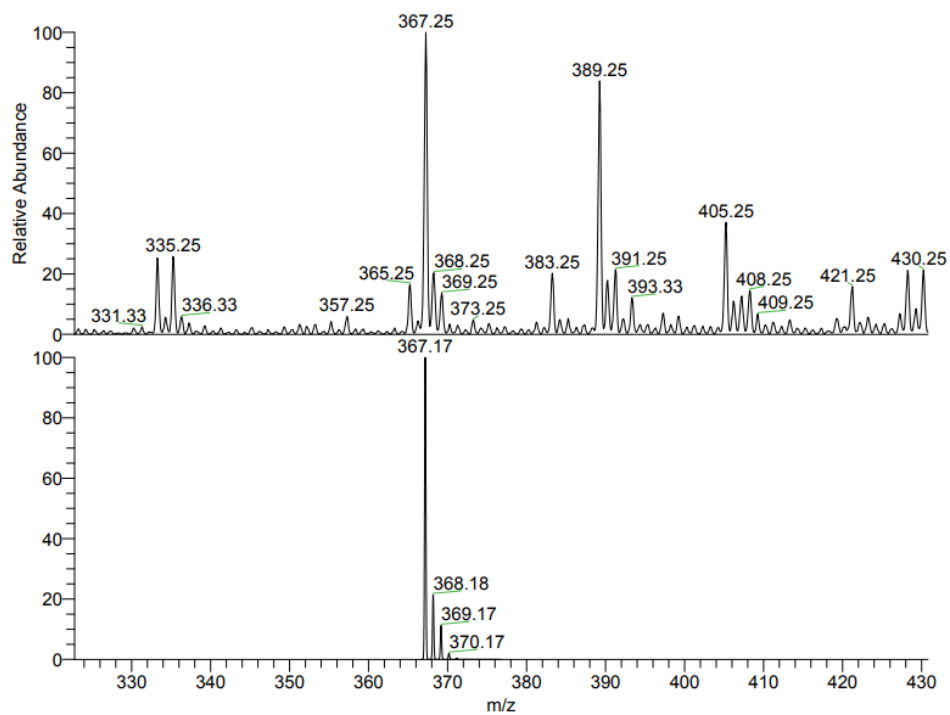

Figure S5. Positive ion ESI-MS for  $H_2L^S$ .

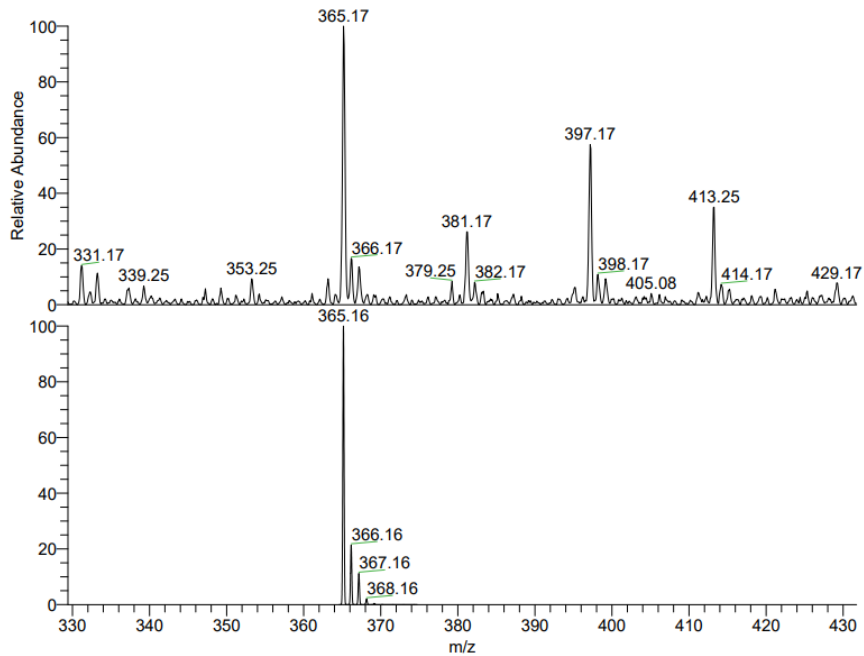

Figure S6. Negative ion ESI-MS for  $H_2L^S$ .

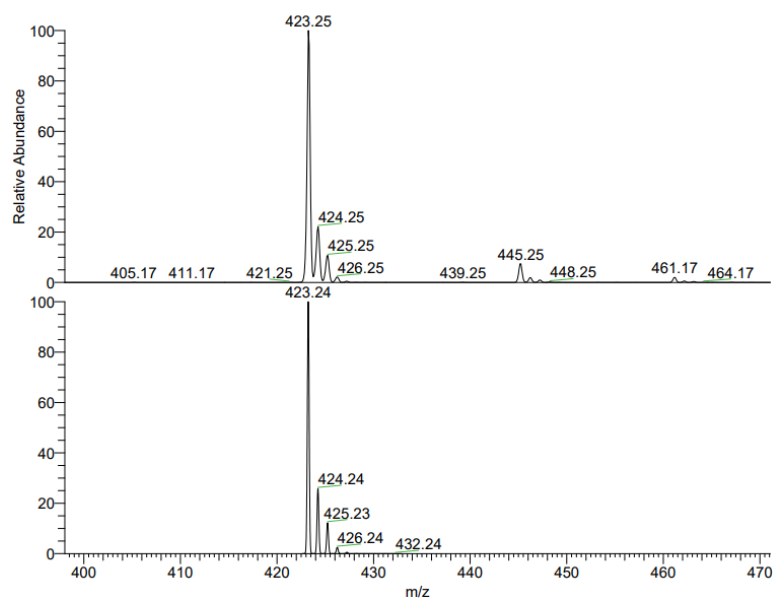

**Figure S7.** Positive ion ESI-MS for H<sub>2</sub>L<sup>SEt</sup>.

### 1.3. IR spectra of the ligands

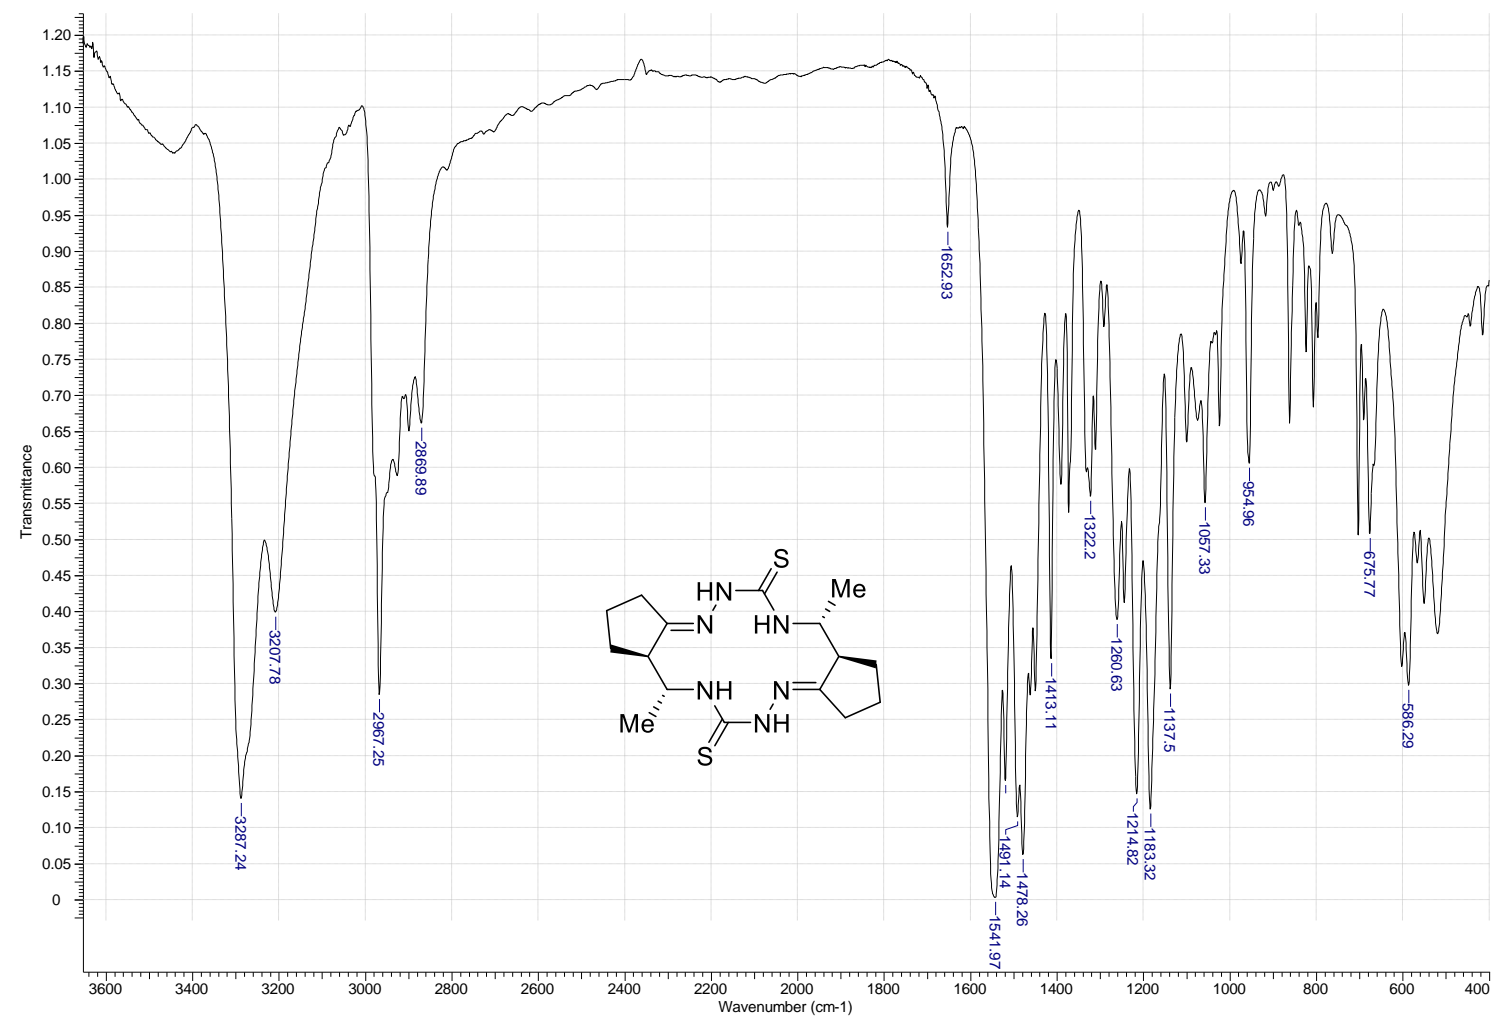

**Figure S8.** IR spectrum of (5*R*\*,6*R*\*,12*R*\*,13*R*\*)-6 (KBr).

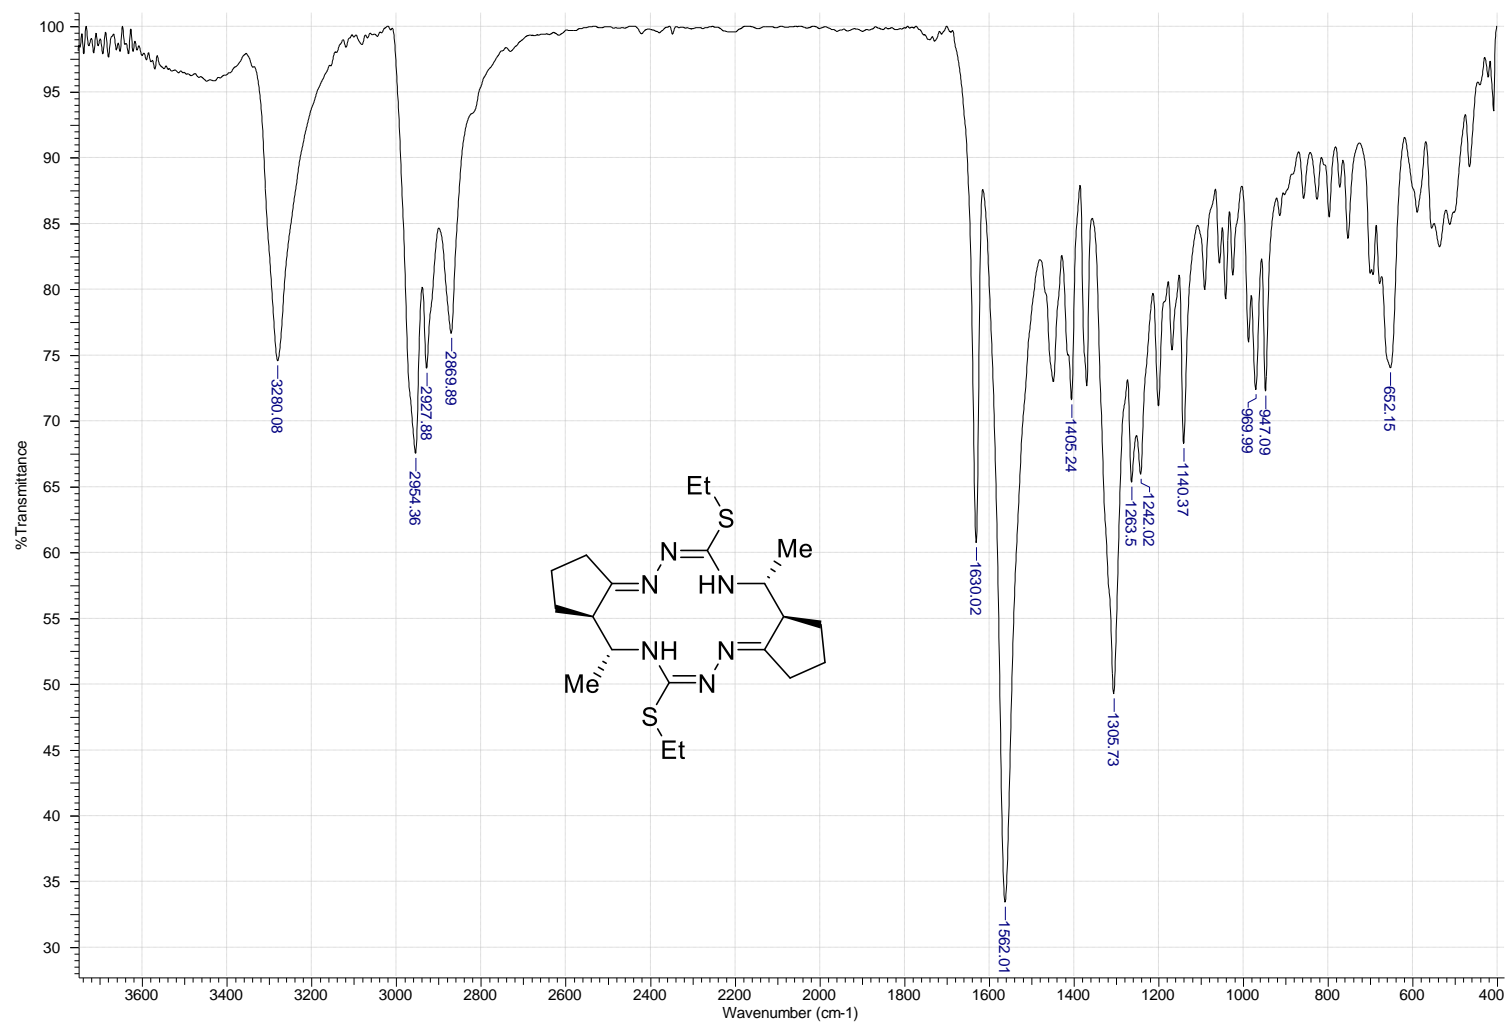

**Figure S9.** IR spectrum of (5R\*,6R\*,12R\*,13R\*)-8 (KBr).

## 2. Characterization of Ni(II) complexes

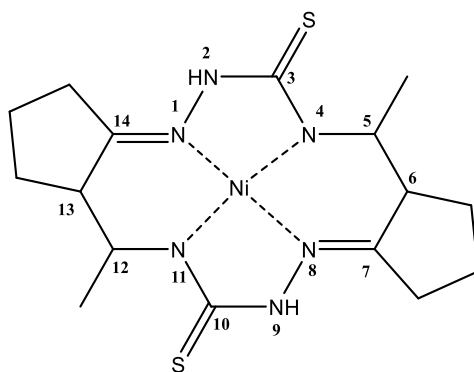

**Scheme S1.** The atom numbering for the assignment of resonances of Ni(II) complexes.

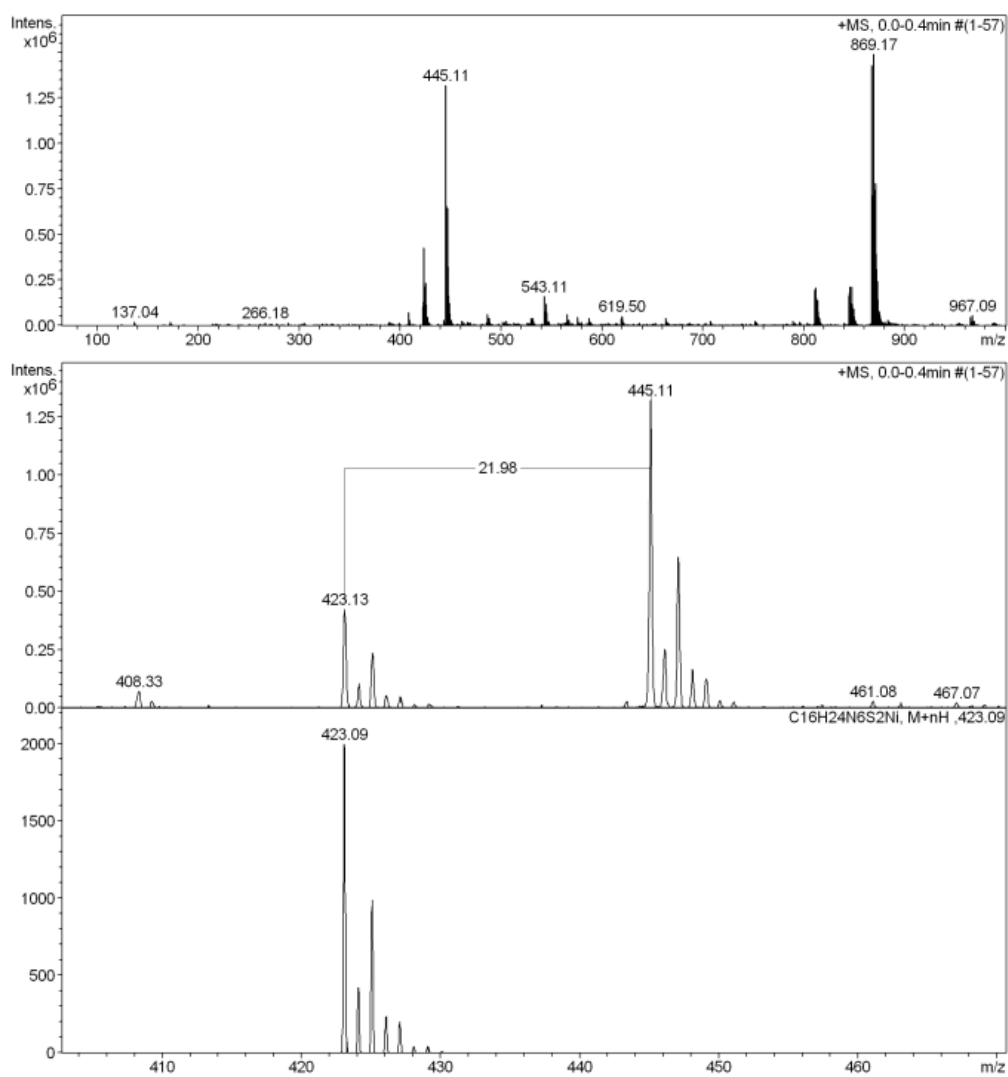

**Figure S10.** Positive ion ESI-MS for Ni<sup>II</sup>L<sup>S</sup>.

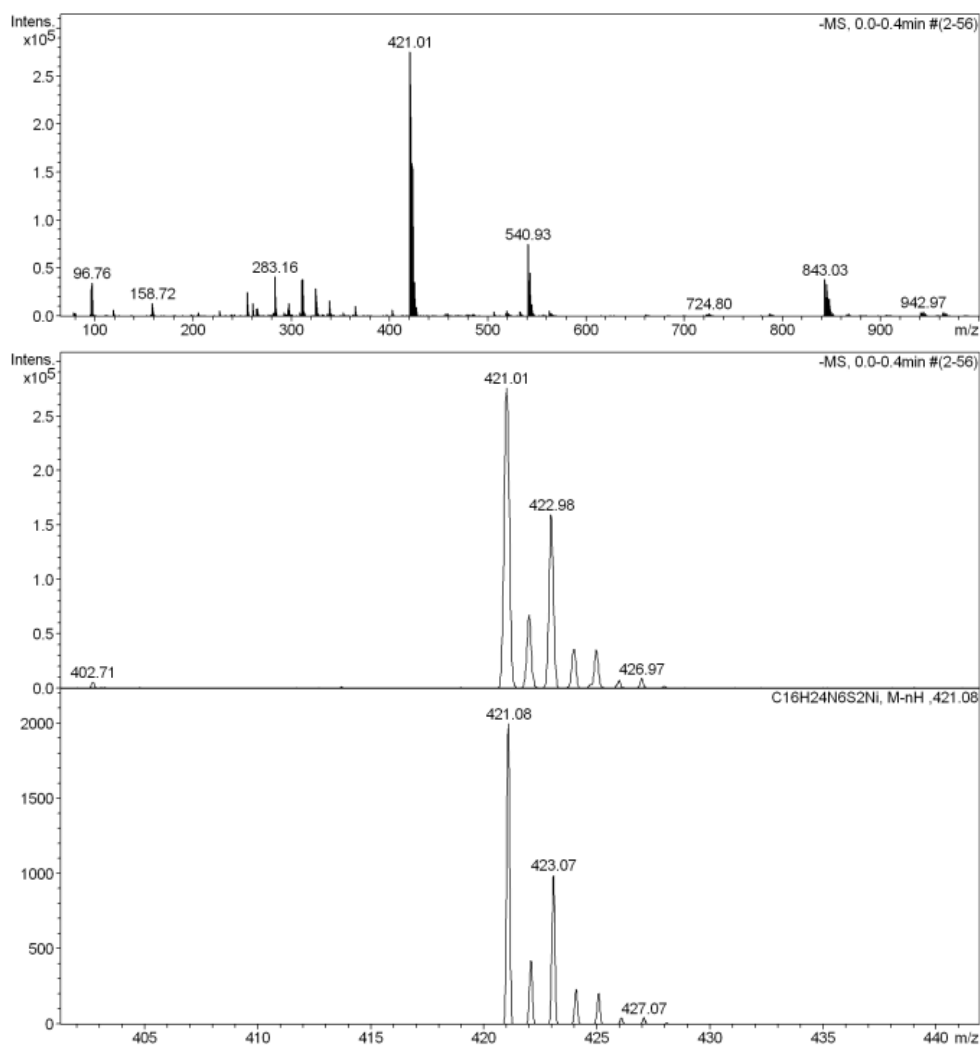

**Figure S11.** Negative ion ESI-MS for  $\text{Ni}^{\text{III}}\text{L}^{\text{S}}$ .

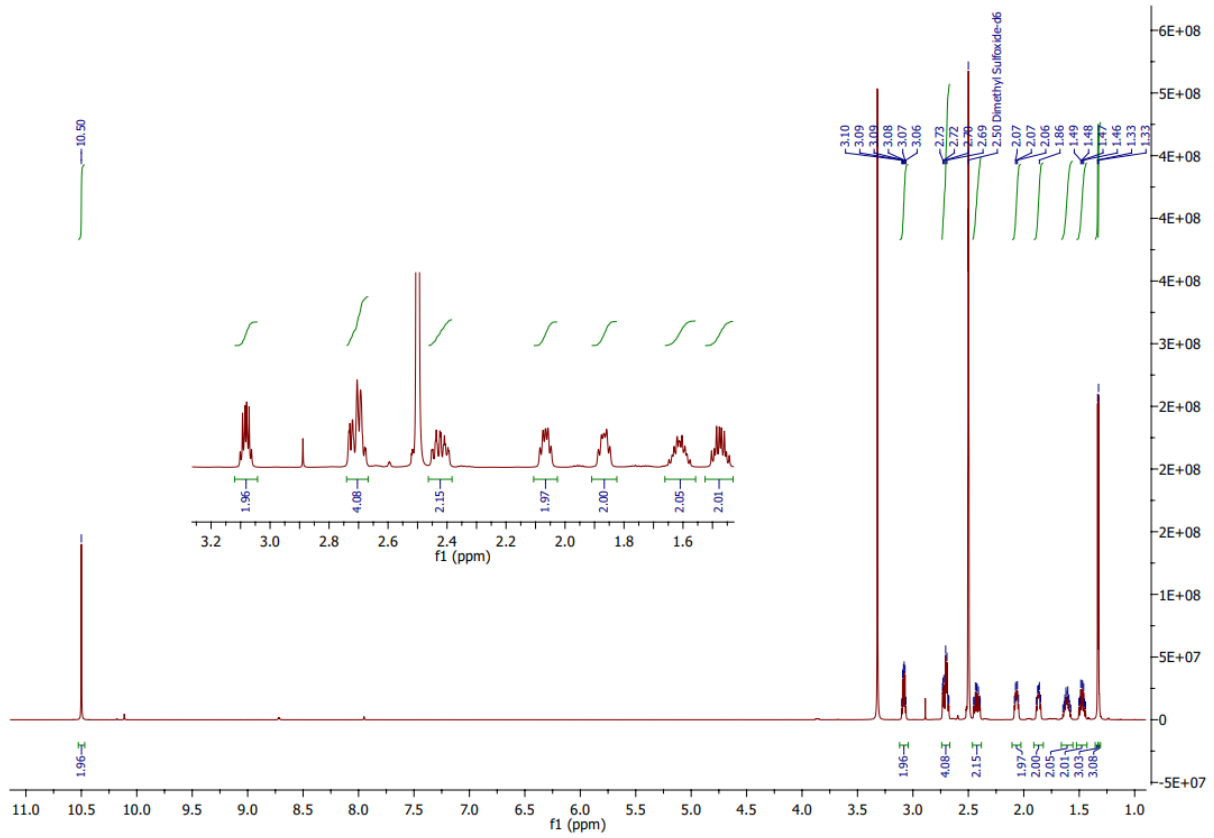

Figure S12.  $^1\text{H}$  NMR spectra for  $\text{Ni}^{\text{II}}\text{L}^{\text{S}}$ .

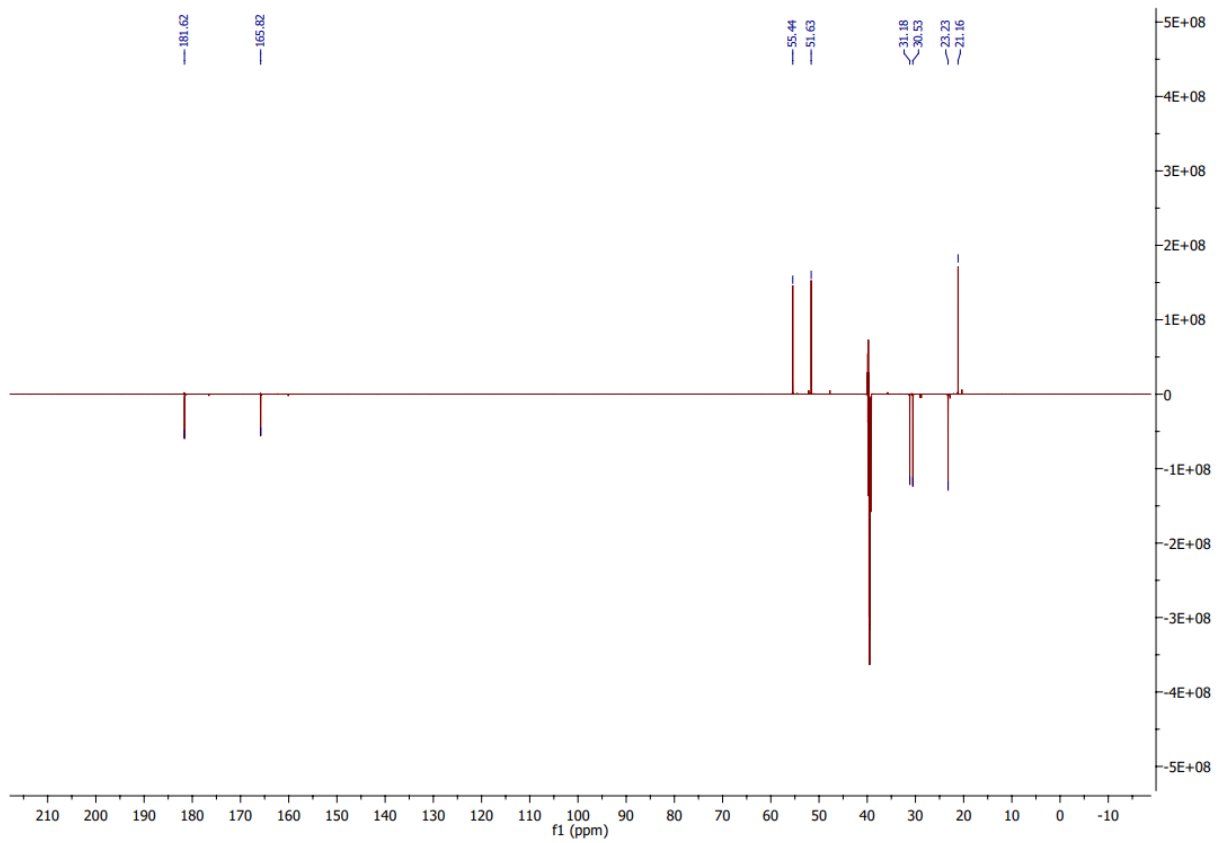

Figure S13.  $^{13}\text{C}$  NMR spectra for  $\text{Ni}^{\text{II}}\text{L}^{\text{S}}$ .



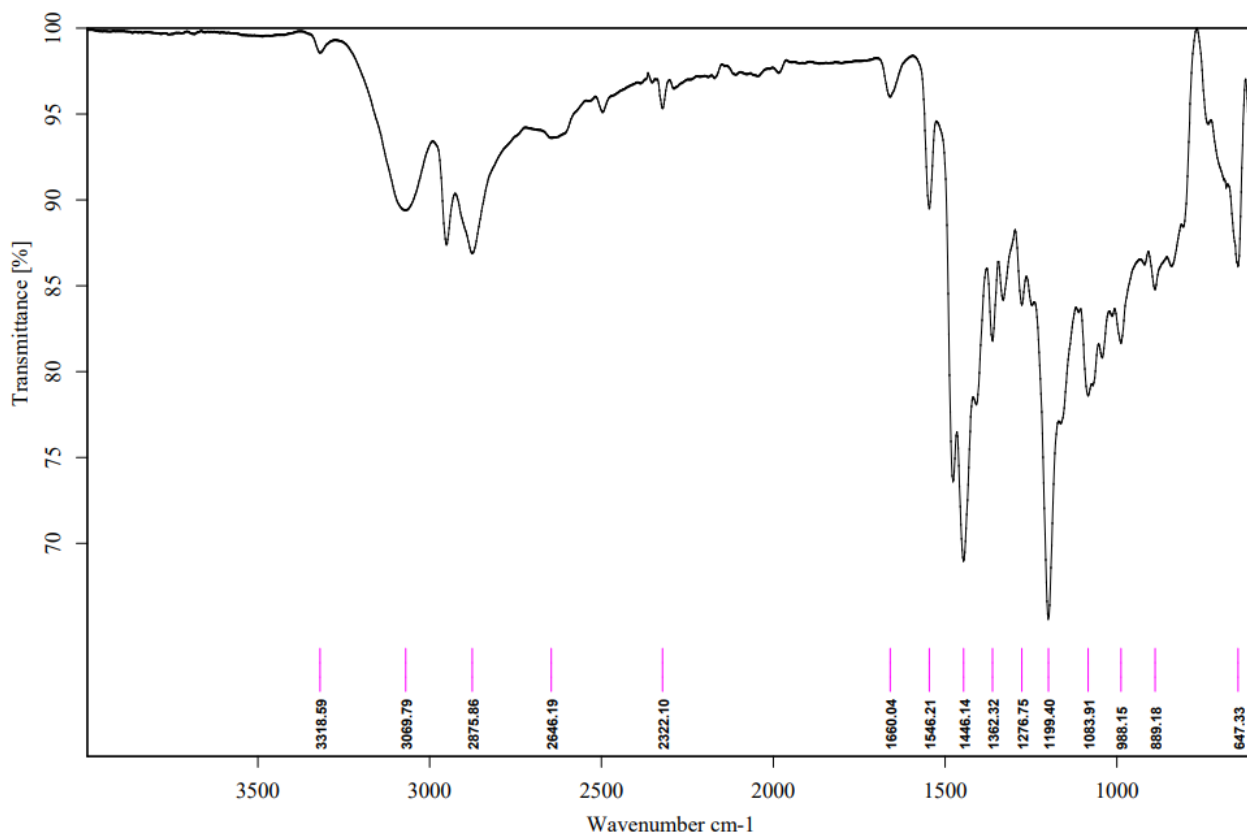

**Figure S14.** IR spectra for  $\text{Ni}^{\text{II}}\text{L}^{\text{S}}$ .

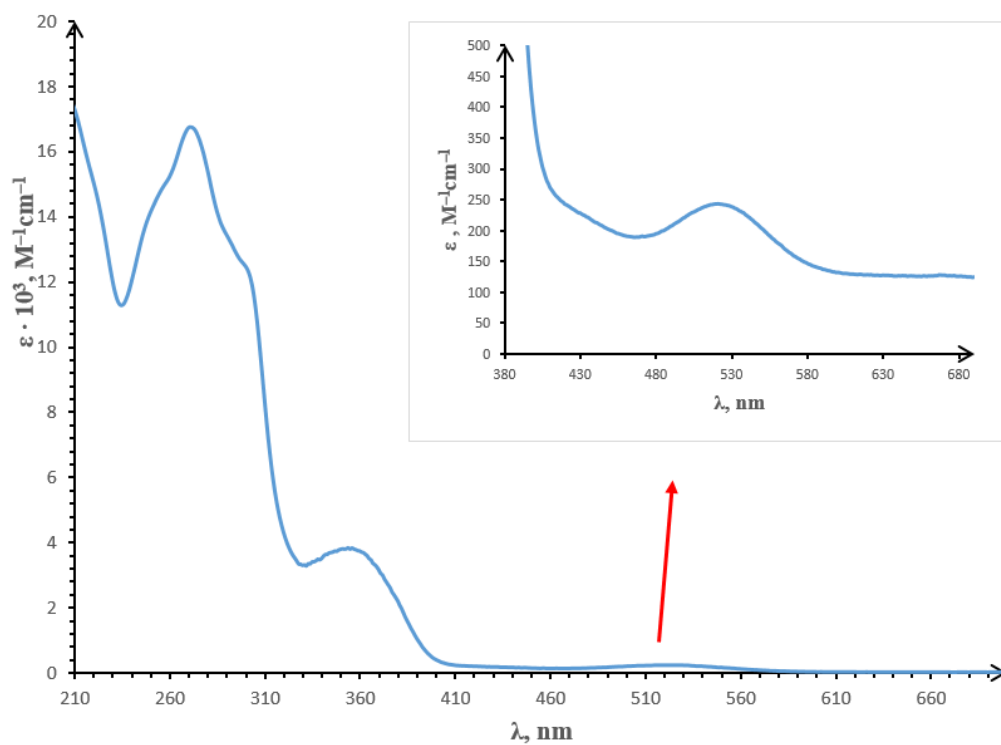

**Figure S15.** UV-vis absorption spectrum for  $\text{Ni}^{\text{II}}\text{L}^{\text{S}}$  in methanol.

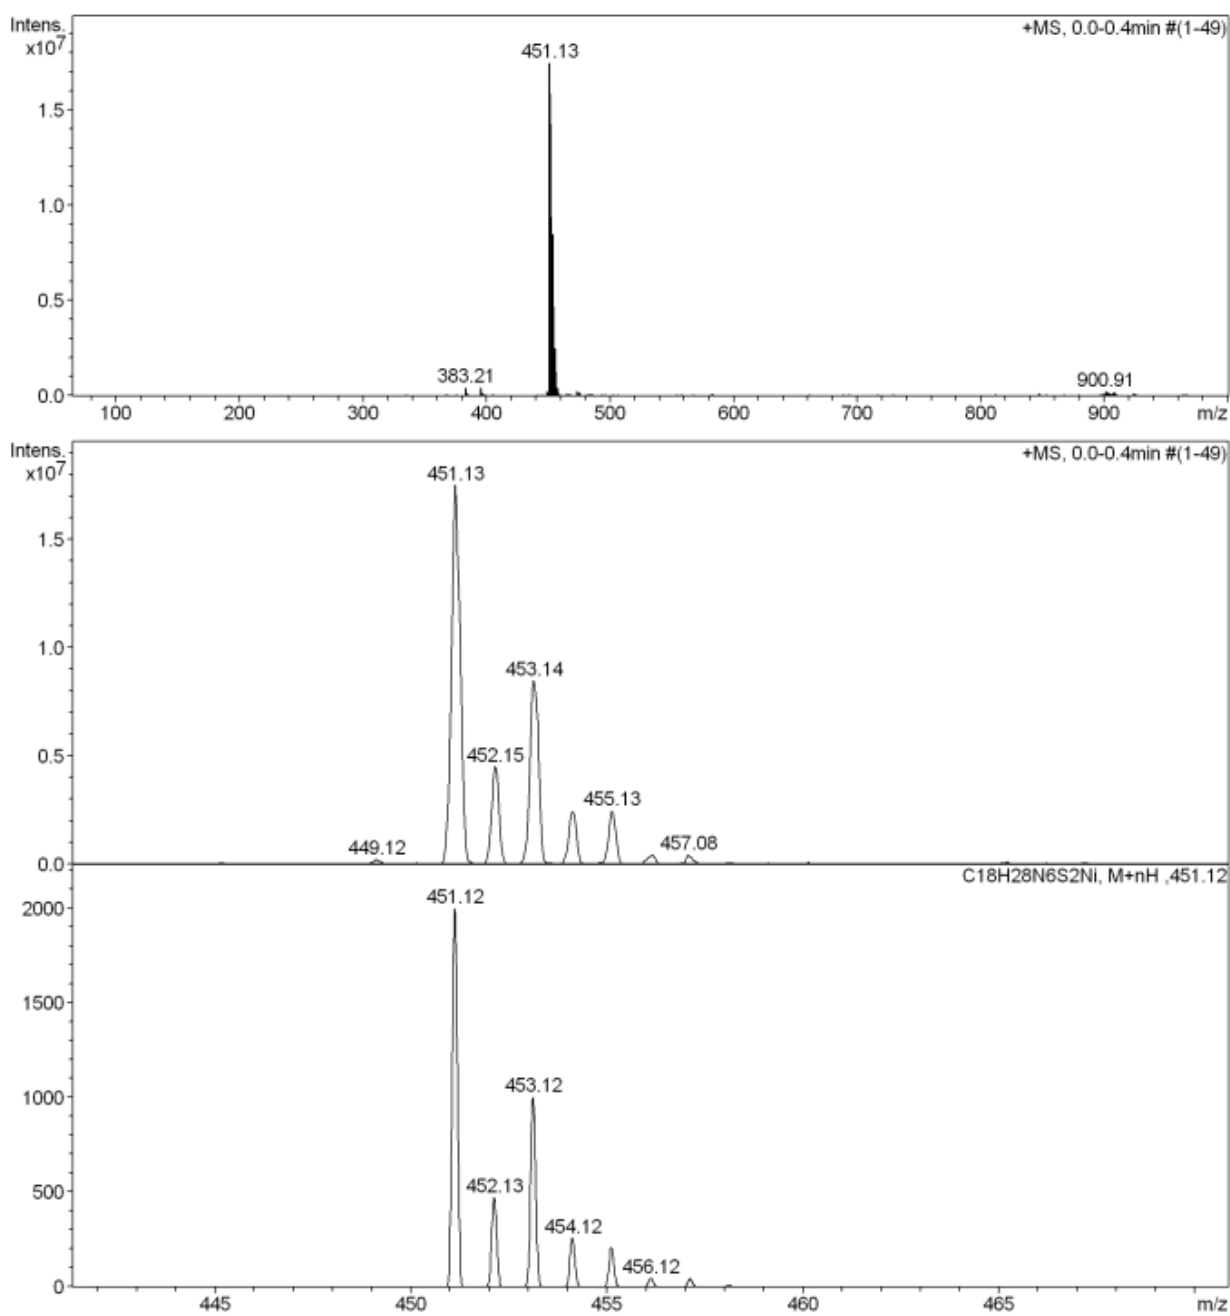

**Figure S16.** Positive ion ESI-MS for Ni(II)L<sup>SMe</sup>.

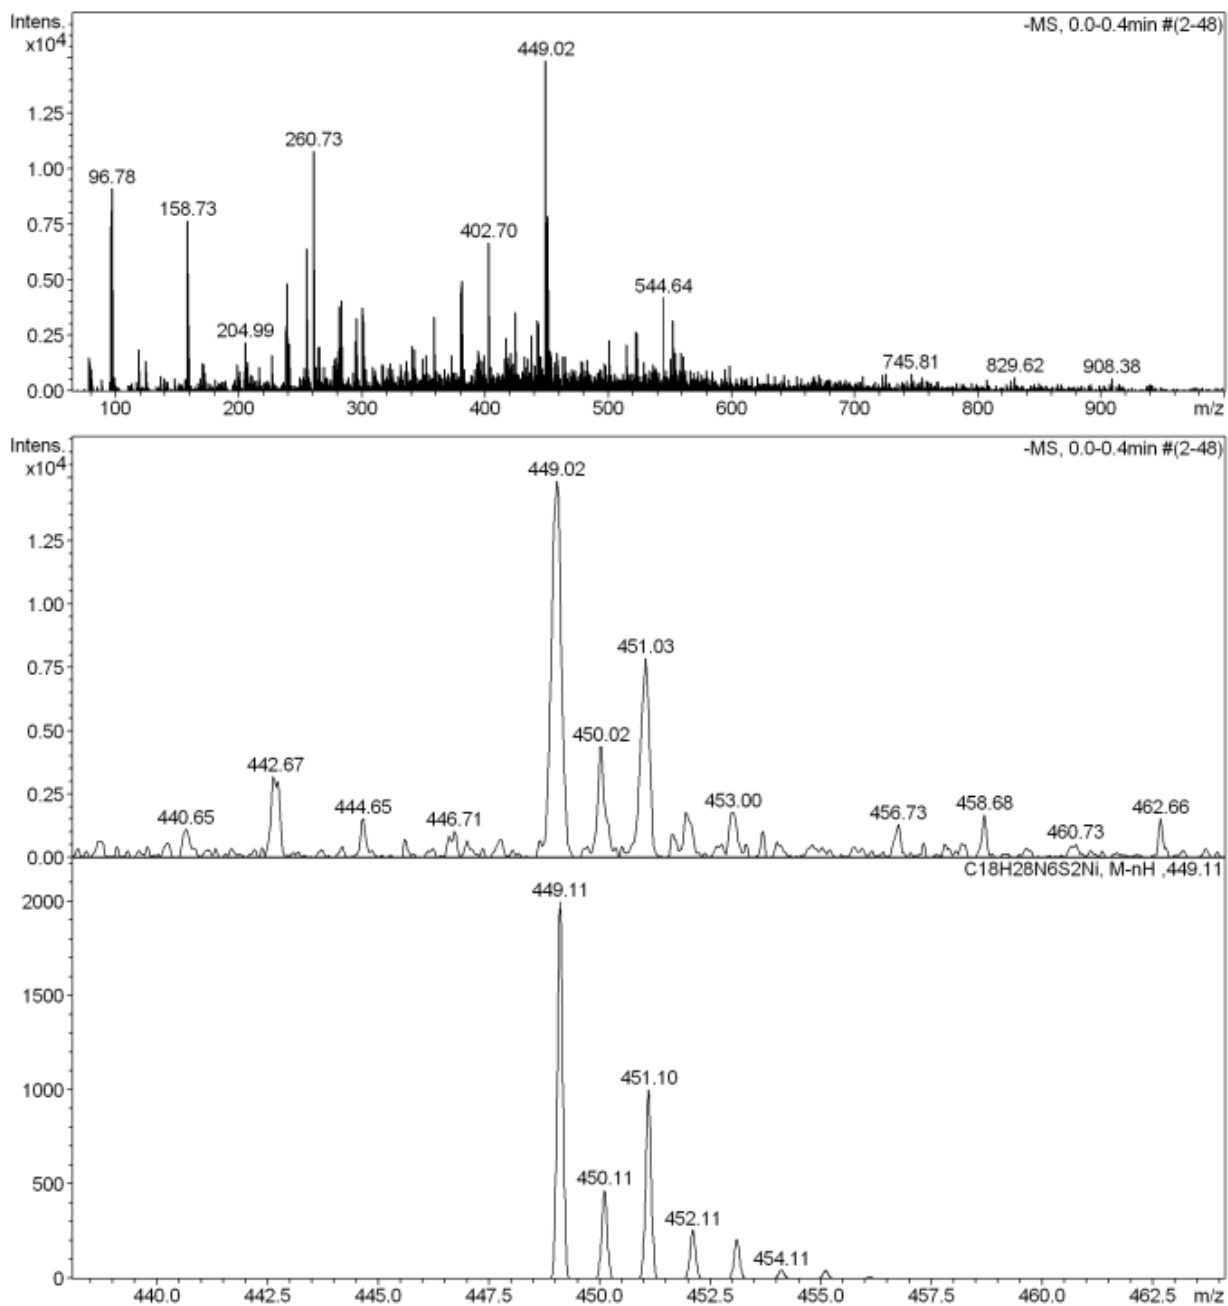

**Figure S17.** Negative ion ESI-MS for  $\text{Ni}^{\text{II}} \text{L}^{\text{SMe}}$ .

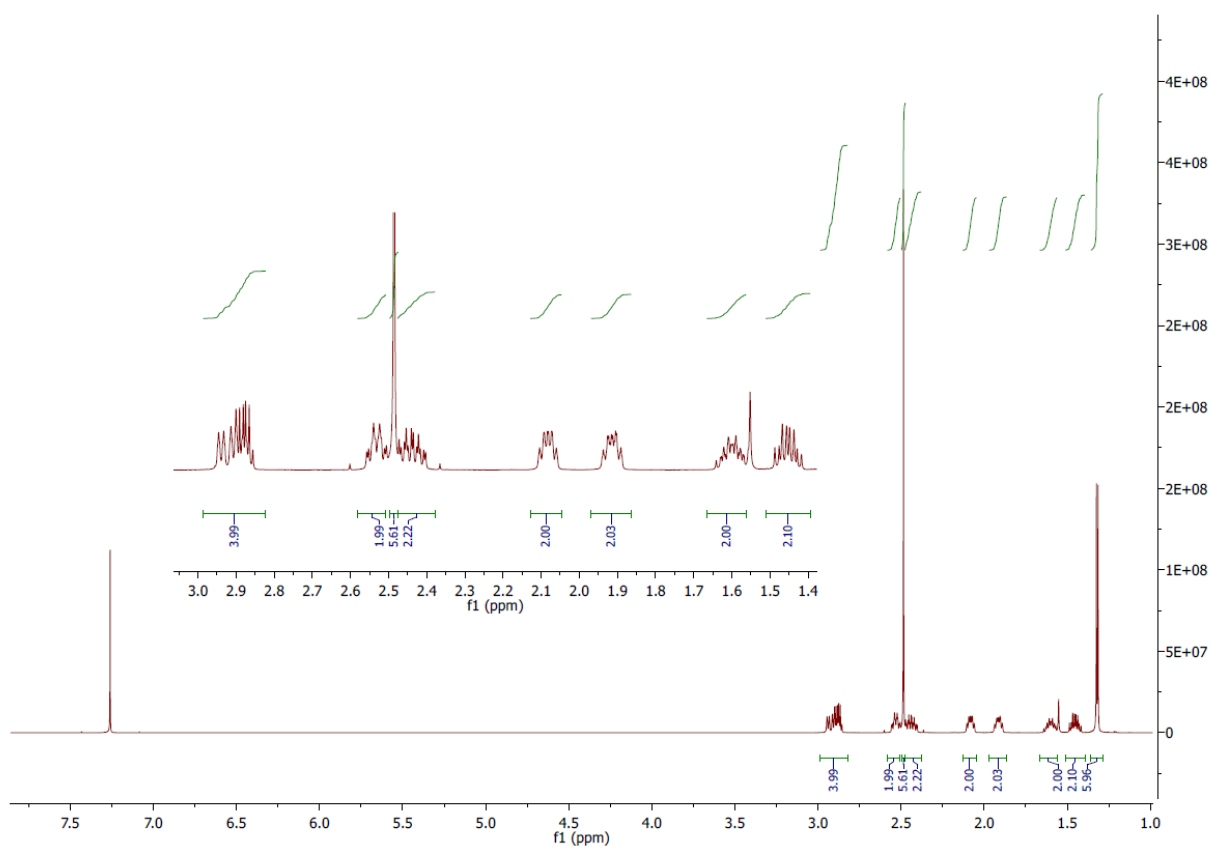

**Figure S18.**  $^1\text{H}$  NMR spectra for  $\text{Ni}^{\text{II}}\text{L}^{\text{SMe}}$ .

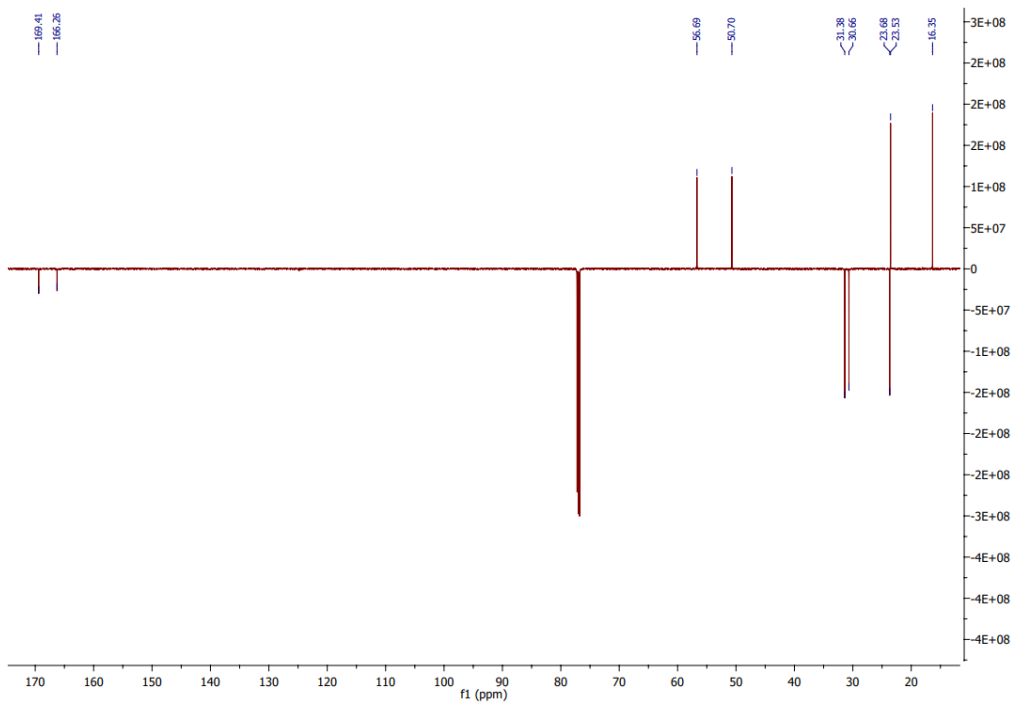

**Figure S19.**  $^{13}\text{C}$  NMR spectrum for  $\text{Ni}^{\text{II}}\text{L}^{\text{SMe}}$ .

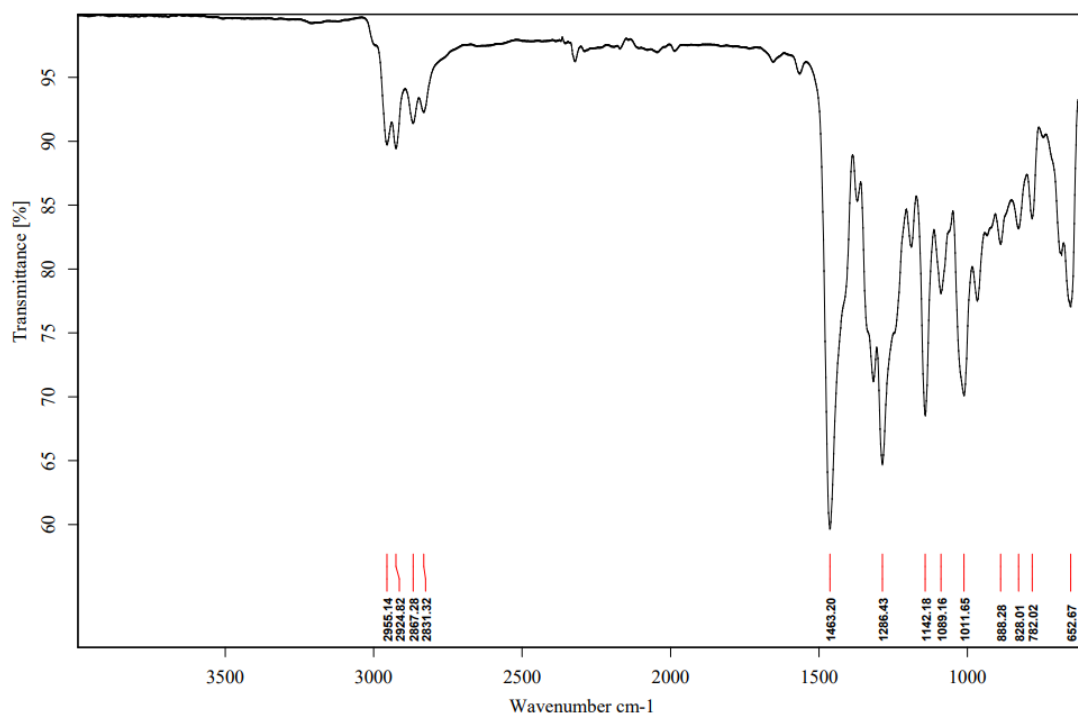

**Figure S20.** IR spectra for  $\text{Ni}^{\text{II}}\text{L}^{\text{SM}_e}$ .

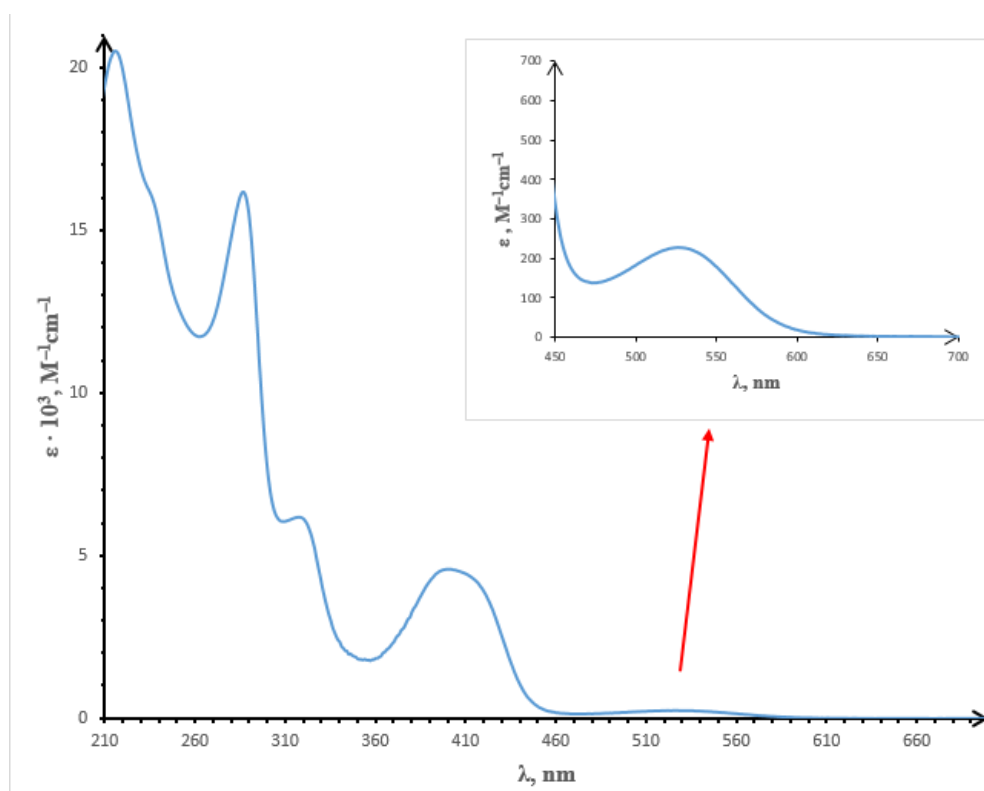

**Figure S21.** UV-vis absorption spectrum of  $\text{Ni}^{\text{II}}\text{L}^{\text{SM}_e}$  in methanol.

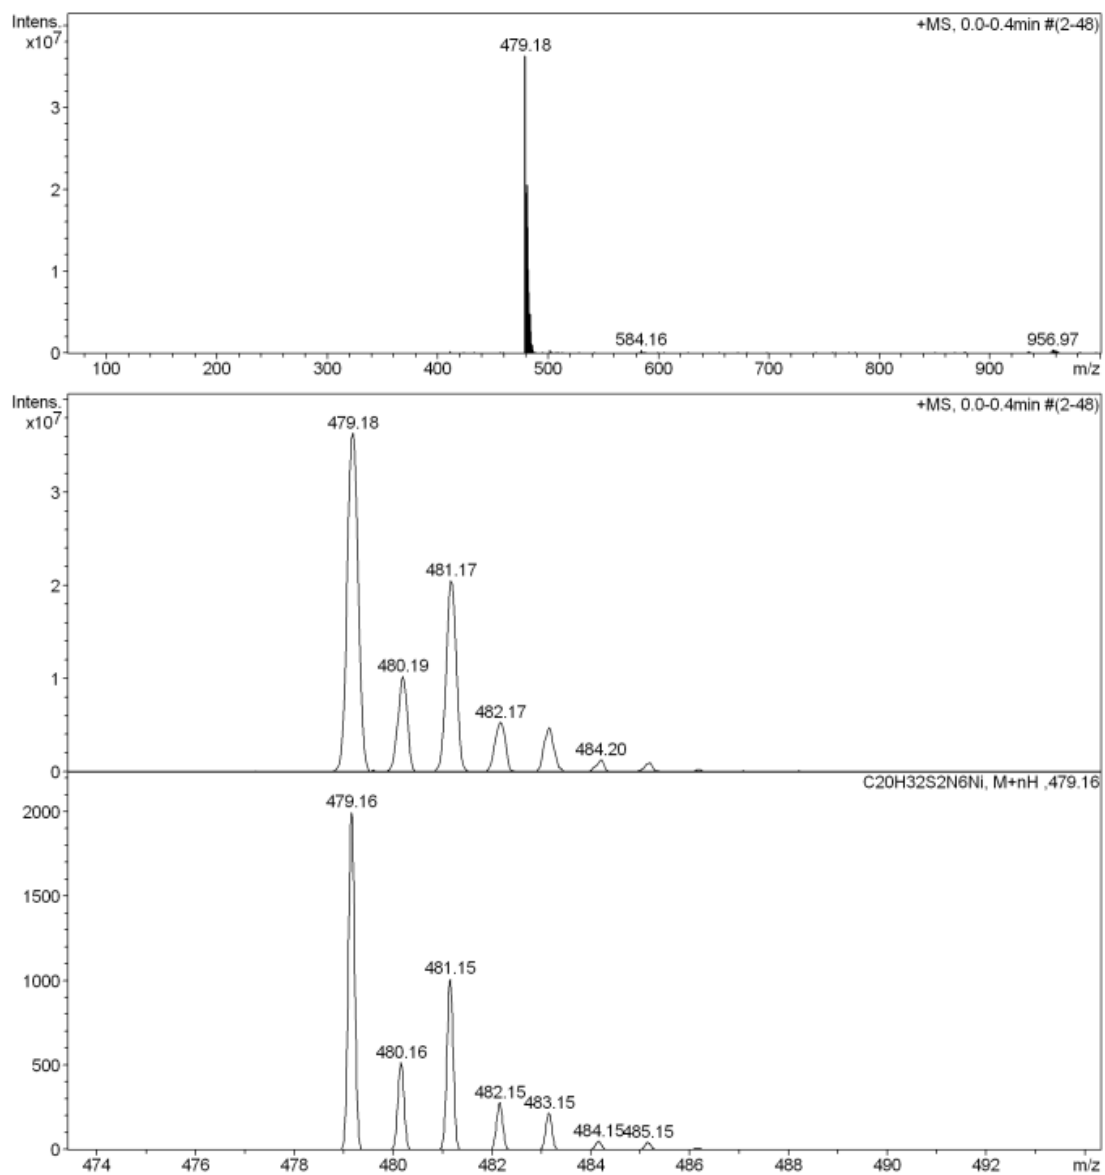

**Figure S22.** Positive ion ESI-MS for Ni<sup>II</sup>L<sup>SEt</sup>.

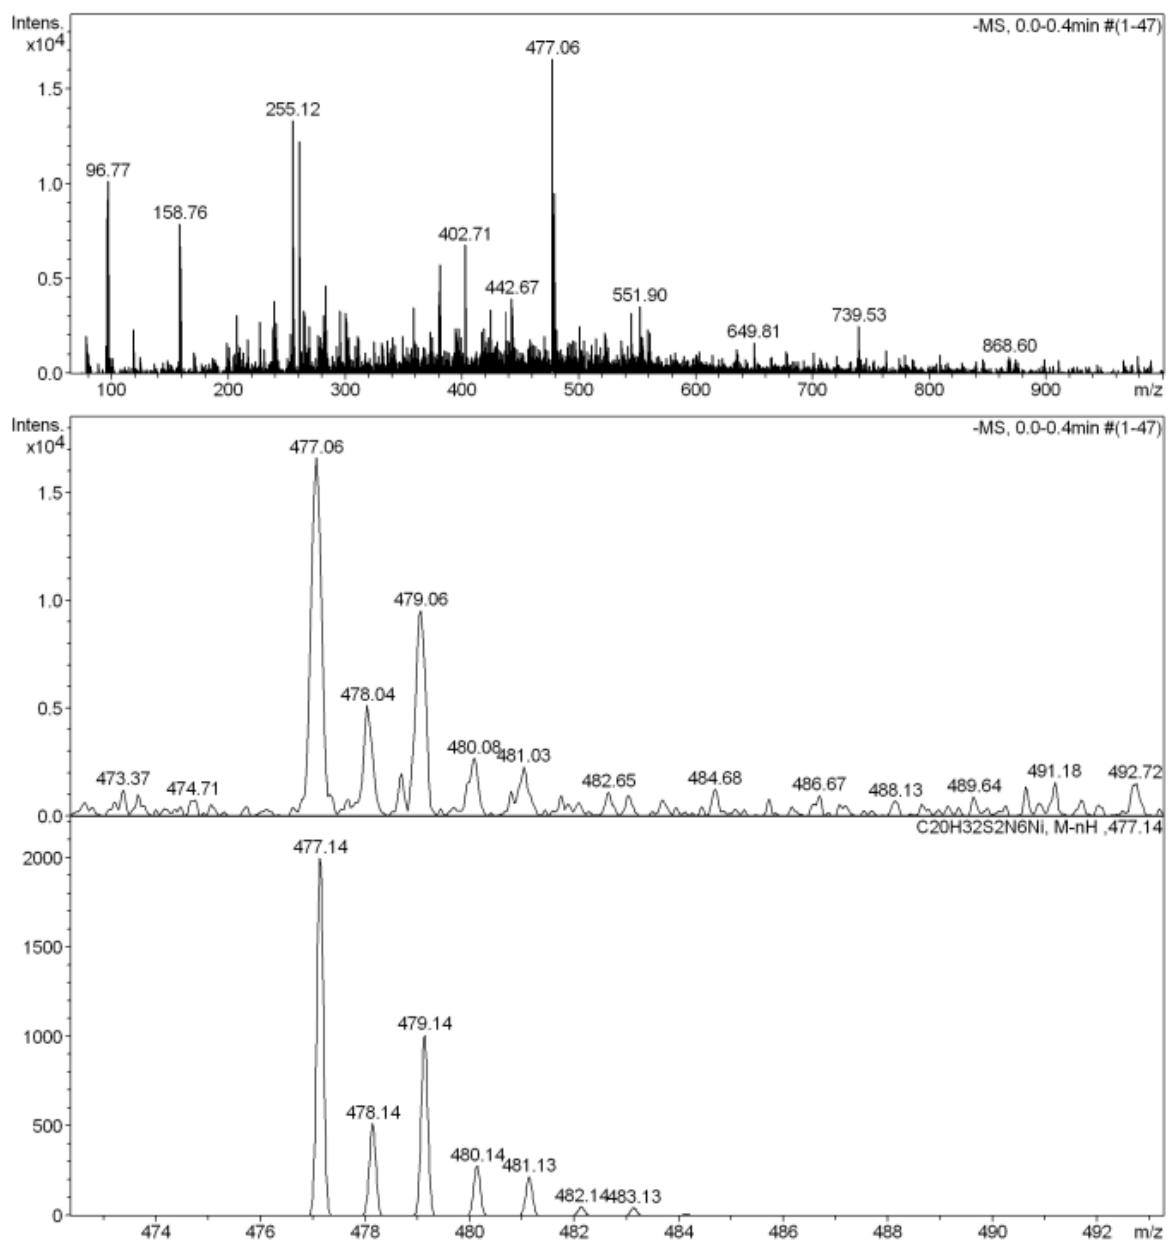

**Figure S23.** Negative ion ESI-MS for  $\text{Ni}^{\text{II}}\text{L}^{\text{SEt}}$ .

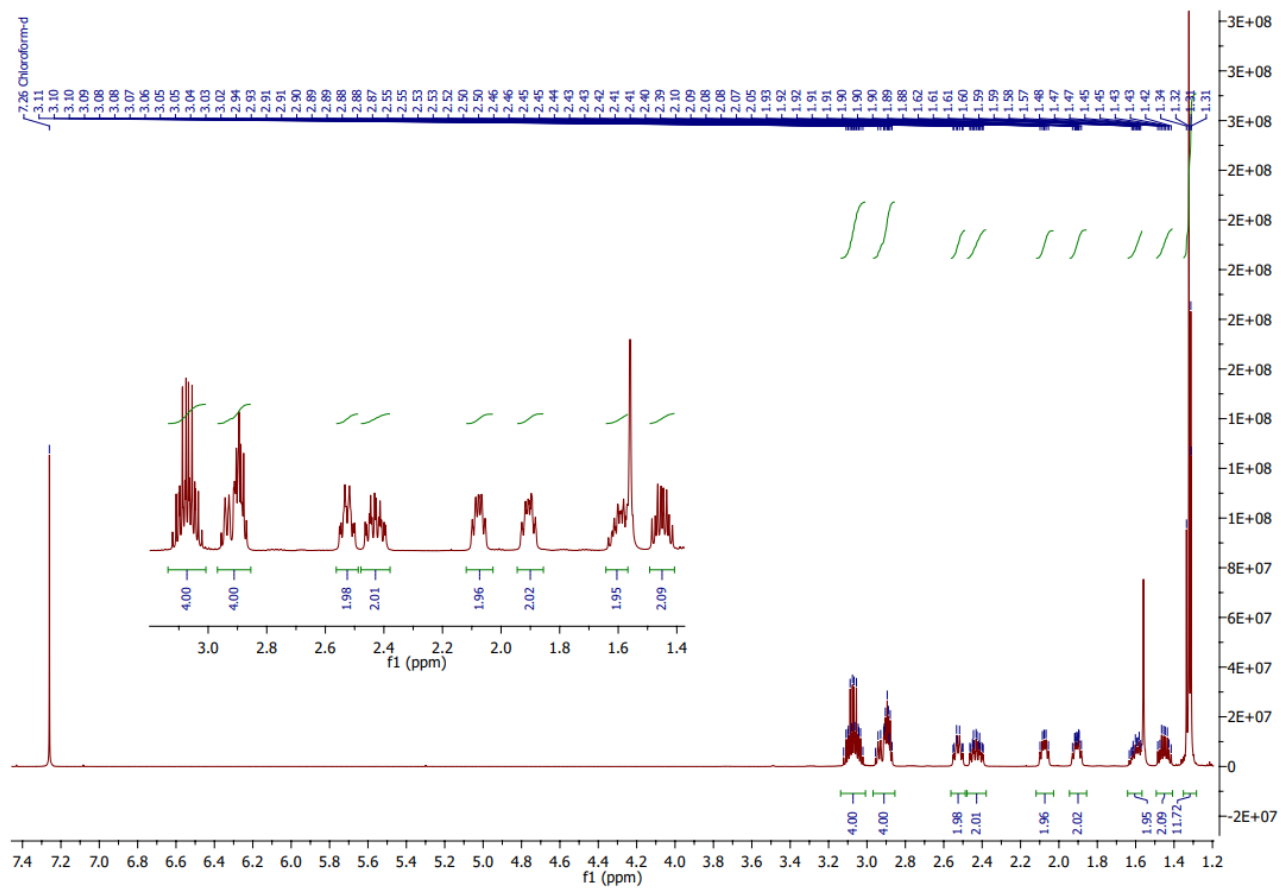

**Figure S24.**  $^1\text{H}$  NMR spectrum for  $\text{Ni}^{\text{II}}\text{L}^{\text{SEt}}$ .



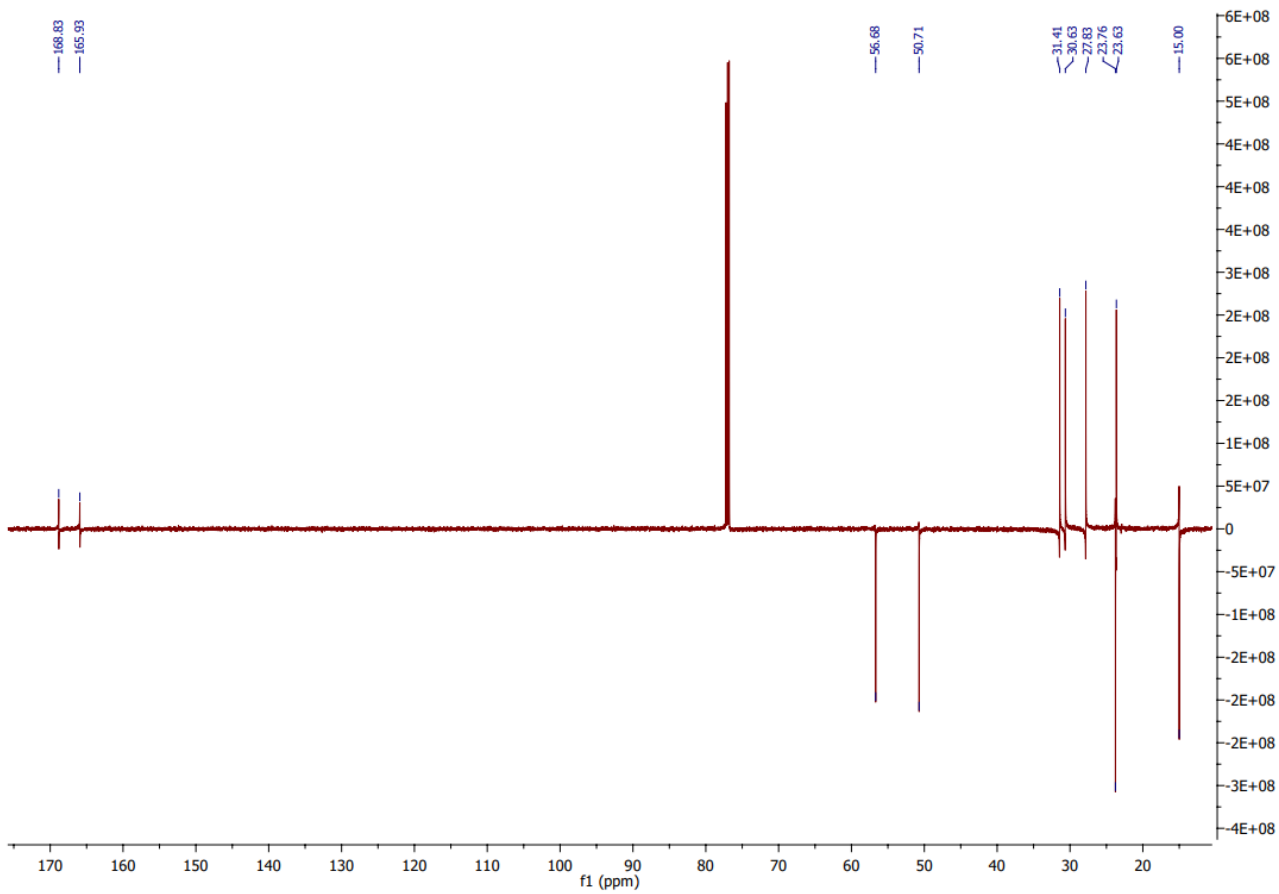

**Figure S25.**  $^{13}\text{C}$  NMR spectra for  $\text{Ni}^{\text{II}}\text{L}^{\text{SEt}}$ .

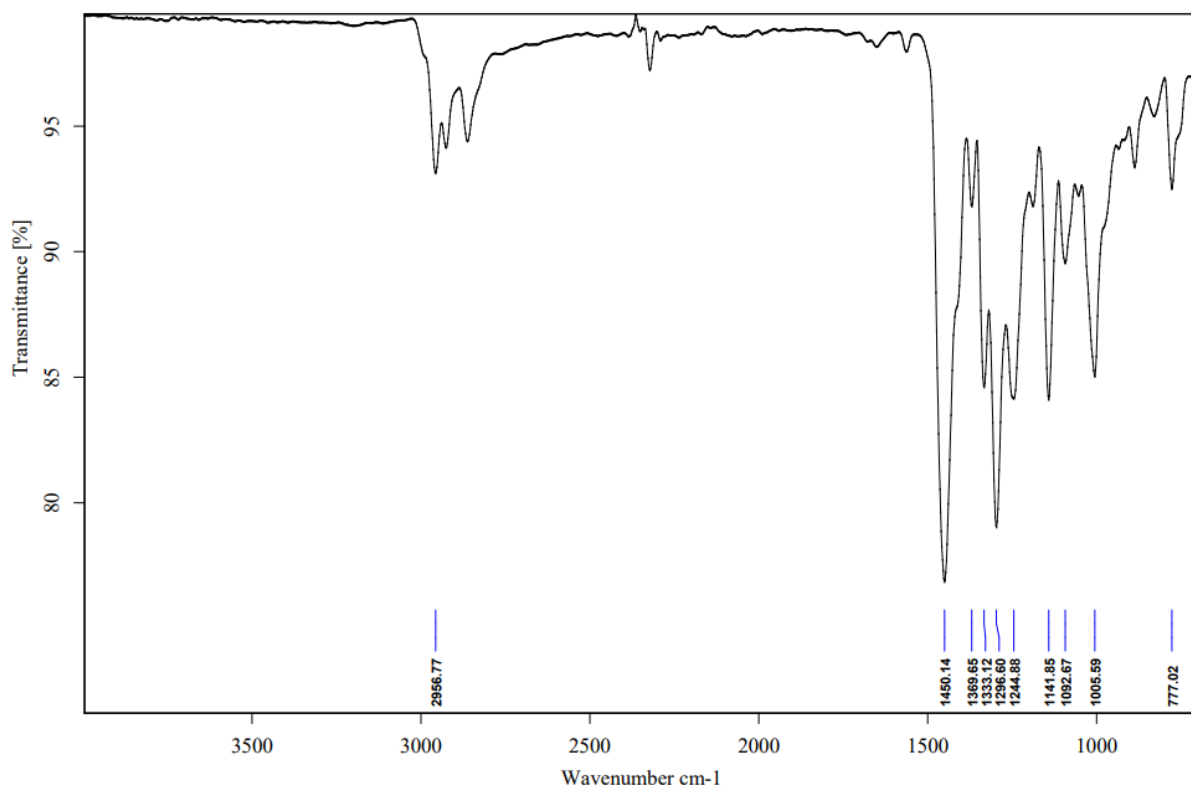

**Figure S26.** IR spectrum of  $\text{Ni}^{\text{II}}\text{L}^{\text{SEt}}$ .

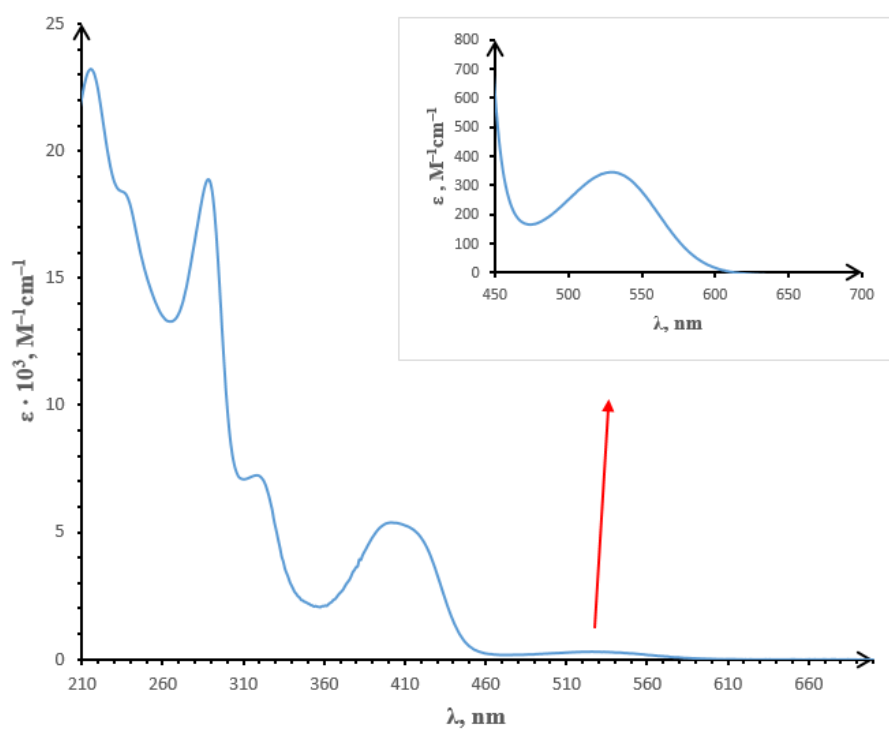

**Figure S27.** UV-vis absorption spectrum of  $\text{Ni}^{\text{II}}\text{L}^{\text{SEt}}$ .

### 3. Crystallographic data

**Table S1.** Deviation of atoms in 5-membered rings from respective NiN<sub>2</sub> planes in Ni<sup>II</sup>L<sup>S</sup>.

| Atom         | NiN1N2C3N4 | NiN8N9C10N11 |
|--------------|------------|--------------|
| N2/N9        | -0.393(5)  | -0.387(5)    |
| C3/C10       | -0.237(5)  | -0.302(4)    |
| Conformation | envelope   | envelope     |

**Table S2.** Deviation of atoms in 6-membered rings from respective NiN<sub>2</sub> planes in Ni<sup>II</sup>L<sup>S</sup>.

| Atom         | NiN4C5C6C7N8 | NiN11C12C13C14N1 |
|--------------|--------------|------------------|
| C5/C12       | 0.636(5)     | 0.393(5)         |
| C6/C13       | 0.270(6)     | 0.874(5)         |
| C7/C14       | -0.145(5)    | 0.193(5)         |
| C15/C16      | 2.155(5)     | 1.529(6)         |
| Conformation | A            | B                |

**Table S3.** Crystal Data and Details of Data Collection and Refinement for **H<sub>2</sub>L<sup>S</sup>**, **H<sub>2</sub>L<sup>SEt</sup>**, **NiL<sup>S</sup>**, **NiL<sup>SMe</sup>** and **NiL<sup>SEt</sup>**.

| compound                                   | <b>H<sub>2</sub>L<sup>S</sup></b>                             | <b>H<sub>2</sub>L<sup>SEt</sup></b>                           | <b>NiL<sup>S</sup></b>                                          | <b>NiL<sup>SMe</sup></b>                                        | <b>NiL<sup>SEt</sup></b>                                        |
|--------------------------------------------|---------------------------------------------------------------|---------------------------------------------------------------|-----------------------------------------------------------------|-----------------------------------------------------------------|-----------------------------------------------------------------|
| empirical formula                          | C <sub>16</sub> H <sub>26</sub> N <sub>6</sub> S <sub>2</sub> | C <sub>20</sub> H <sub>34</sub> N <sub>6</sub> S <sub>2</sub> | C <sub>16</sub> H <sub>24</sub> N <sub>6</sub> NiS <sub>2</sub> | C <sub>18</sub> H <sub>28</sub> N <sub>6</sub> NiS <sub>2</sub> | C <sub>20</sub> H <sub>32</sub> N <sub>6</sub> NiS <sub>2</sub> |
| fw                                         | 366.55                                                        | 422.65                                                        | 423.24                                                          | 451.29                                                          | 479.34                                                          |
| space group                                | <i>Pbca</i>                                                   | <i>P</i> -1                                                   | <i>Cc</i>                                                       | <i>P</i> 2 <sub>1</sub> / <i>c</i>                              | <i>P</i> -1                                                     |
| <i>a</i> , Å                               | 17.0619(9)                                                    | 9.2324(7)                                                     | 17.4292(5)                                                      | 11.5410(2)                                                      | 11.6032(10)                                                     |
| <i>b</i> , Å                               | 9.7583(3)                                                     | 10.4294(7)                                                    | 6.6235(3)                                                       | 13.7657(2)                                                      | 13.6885(12)                                                     |
| <i>c</i> , Å                               | 21.8947(7)                                                    | 12.5483(8)                                                    | 16.2981(5)                                                      | 13.0159(2)                                                      | 16.1127(13)                                                     |
| $\alpha$ , °                               |                                                               | 101.269(5)                                                    |                                                                 |                                                                 | 112.018(3)                                                      |
| $\beta$ , °                                |                                                               | 103.562(6)                                                    | 100.416(2)                                                      | 103.9050(10)                                                    | 90.826(3)                                                       |
| $\gamma$ , °                               |                                                               | 93.900(6)                                                     |                                                                 |                                                                 | 107.495(3)                                                      |
| <i>V</i> [Å <sup>3</sup> ]                 | 3645.4(3)                                                     | 1143.68(14)                                                   | 1850.48(11)                                                     | 2007.24(6)                                                      | 2239.3(3)                                                       |
| <i>Z</i>                                   | 8                                                             | 2                                                             | 4                                                               | 4                                                               | 2                                                               |
| $\lambda$ [Å]                              | 0.71073                                                       | 1.54186                                                       | 0.71073                                                         | 0.71073                                                         | 0.71073                                                         |
| $\rho_{\text{calcd}}$ , g cm <sup>-3</sup> | 1.336                                                         | 1.227                                                         | 1.519                                                           | 1.493                                                           | 1.422                                                           |
| cryst size, mm <sup>3</sup>                | 0.10 × 0.08 × 0.03                                            | 0.13 × 0.11 × 0.11                                            | 0.24 × 0.15 × 0.07                                              | 0.31 × 0.18 × 0.14                                              | 0.25 × 0.10 × 0.05                                              |
| <i>T</i> [K]                               | 100(2)                                                        | 300(2)                                                        | 100(2)                                                          | 100(2)                                                          | 200(2)                                                          |
| $\mu$ , mm <sup>-1</sup>                   | 0.303                                                         | 2.238                                                         | 1.286                                                           | 1.191                                                           | 1.072                                                           |
| <i>R</i> <sub>1</sub> <sup>a</sup>         | 0.0282                                                        | 0.0488                                                        | 0.0292                                                          | 0.0254                                                          | 0.0362                                                          |
| w <i>R</i> <sub>2</sub> <sup>b</sup>       | 0.0739                                                        | 0.1456                                                        | 0.0679                                                          | 0.0639                                                          | 0.0869                                                          |
| GOF <sup>c</sup>                           | 1.038                                                         | 1.056                                                         | 1.089                                                           | 1.021                                                           | 1.010                                                           |
| CCDC no.                                   | 2324332                                                       | 2324333                                                       | 2324334                                                         | 2324335                                                         | 2324336                                                         |

<sup>a</sup>  $R_1 = \sum ||F_o| - |F_c|| / \sum |F_o|$ . <sup>b</sup>  $wR_2 = \{ \sum [w(F_o^2 - F_c^2)^2] / \sum [w(F_o^2)^2] \}^{1/2}$ . <sup>c</sup>  $GOF = \{ \sum [w(F_o^2 - F_c^2)^2] / (n - p) \}^{1/2}$ , where n is the number of reflections and p is the total number of parameters refined.

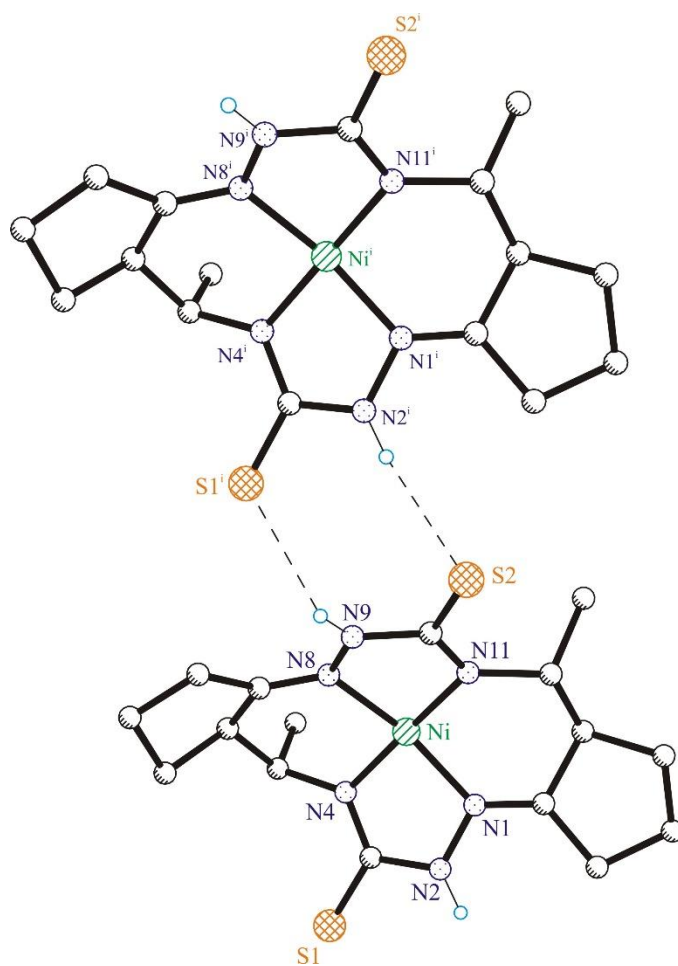

**Figure S28.** Formation of dimeric associates in the crystal of  $\text{Ni}^{\text{II}}\text{L}^{\text{S}}$  via two intermolecular hydrogen bonding interactions of the thiolactam group of the type  $\text{N9-H}\cdots\text{S1}^i$  and  $\text{N2}^i\text{-H}\cdots\text{S2}$ . Symmetry code: (i)  $x - 0.5, y - 0.5, +z$ .
